# Supplementary material for: Fenchone Derivatives as a Novel Class of CB2 Selective Ligands: Design, Synthesis, X-ray Structure and Therapeutic Potential
Source: MDPI journal article supplement (doi:10.3390/molecules27041382), 2022-02-18

## Supplementary Material

1. Figure S1: The HSQC of compound **1d**
2. Figure S2: Crystal structures of **1b** and **4b**
3. Figure S3: Crystal structures of **1d** and **5d**
4. Table S1: Crystal data and structure refinement for **1b**, **4b**, **1d**, and **5d**
5. Table S2: Hydrogen bonds for **1b**, **4b**, **1d**, and **5d** (Å, u)
6. Figure S4: Structural Requirements for CB2 affinity and selectivity
7. Figure S5: Binding site of the CB2 cavity is represented by electrostatic potential surface. The residues of binding site and ligands are represented by thin and thick tubes respectively. H-bonds and  $\pi$ - $\pi$  interactions are represented by orange and cyan dotted lines respectively. A. **5ZTY\_Ligand** B. **HU-308** C. **HU-433** D. **1d**.
8. Figure S6: Two dimensional representation of protein-ligand interactions. A. **5ZTY\_Ligand** B. **HU-308** C. **HU-433** D. **1d**.
9. Table S3: Docking Glide XP score with energy decomposition
10. LC-UV-MS (ESI)
11. NMR data for **1b**
12. NMR data for **1d**
13. NMR data for **5a**

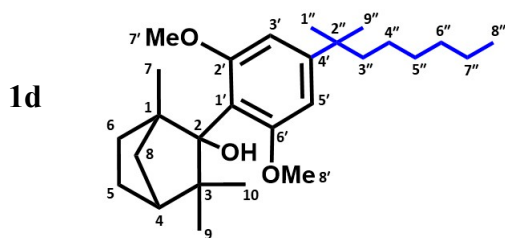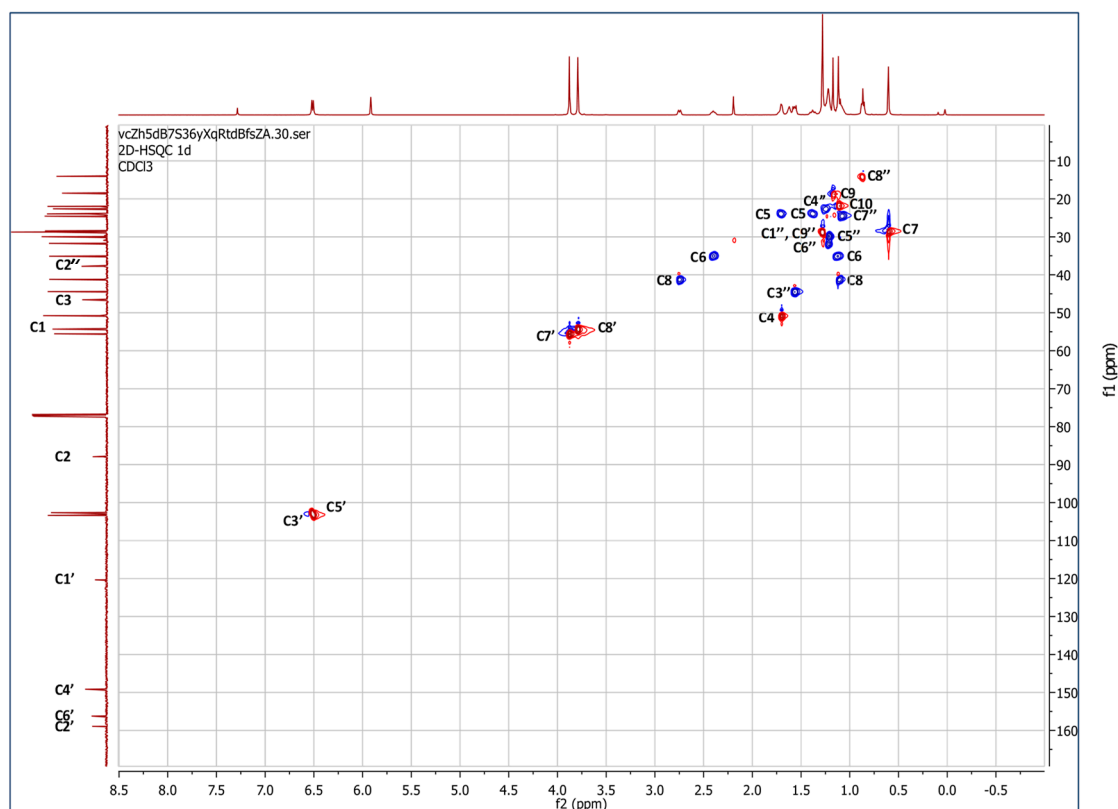

Figure S1: The HSQC of compound **1d**

The cross peaks in the 2D-HSQC confirm which  $^{13}\text{C}$  and  $^1\text{H}$  are coupled via a one-bond scalar coupling. Thus, the quaternary carbon peaks with no directly attached protons in the molecule do not give any cross-peaks. The carbon peaks at about 158.90, 156.21, 149.14, 120.30, 54.16, 87.87, 46.54 and 37.74 ppm in the  $f_1$  dimension display quaternary carbon atoms without detectable cross-peaks. These peaks were assigned to the aromatic carbons C-2', C-6', C-4', C-1', the cyclic carbons C-1, C-2, C-3 and the aliphatic carbon C-2'' respectively. The assignments of the two aromatic protons of H-3' and H-5' (6.50 and 6.48 ppm) were confirmed by their cross-peaks to the aromatic carbons C-3' and C-5' (103.33 and 102.61 ppm). Similarly, the two nonequivalent protons of H-7' and H-8' (3.86 and 3.77 ppm) were confirmed by cross-peaks to the carbon atoms C-7' and C-8' (55.52 and 54.28 ppm). The assignments of the two nonequivalent protons of H-8 (2.73 and 1.26-1.07 ppm) were confirmed by their cross-peaks to the same carbon resonance (41.17 ppm). Similarly, the two nonequivalent protons of H-6 (2.38 and 1.26-1.07 ppm) were confirmed by cross-peaks to the same carbon resonance (35.07 ppm). Also, the two nonequivalent protons of H-5 (1.68 and 1.35 ppm) were confirmed by cross-peaks to the same carbon resonance (23.96 ppm). All the other protonated carbons were assigned in a straightforward manner.

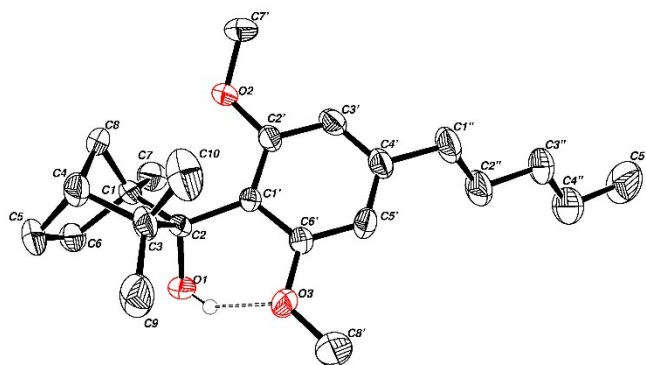

**1b**

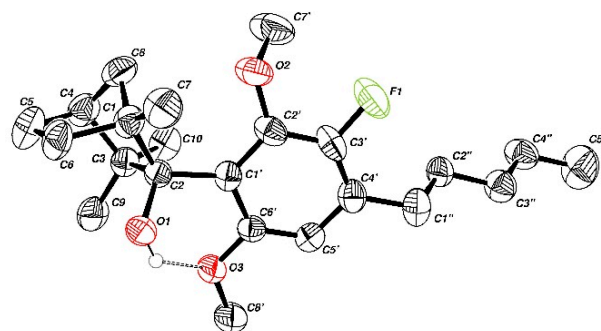

**4b**

Figure S2: Crystal structures of **1b** and **4b**

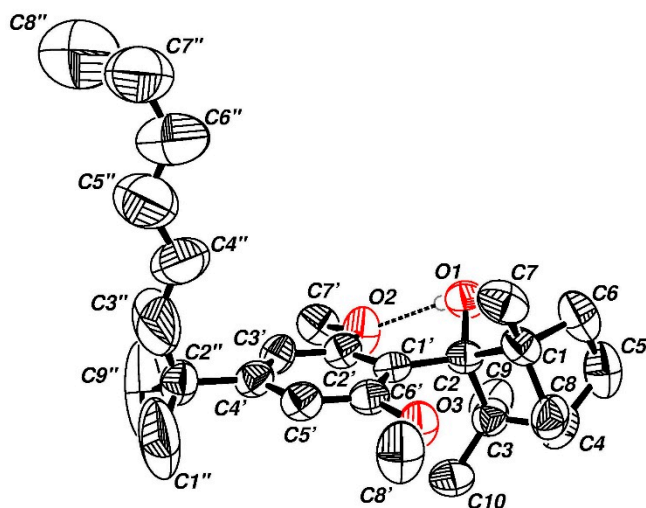

**1d**

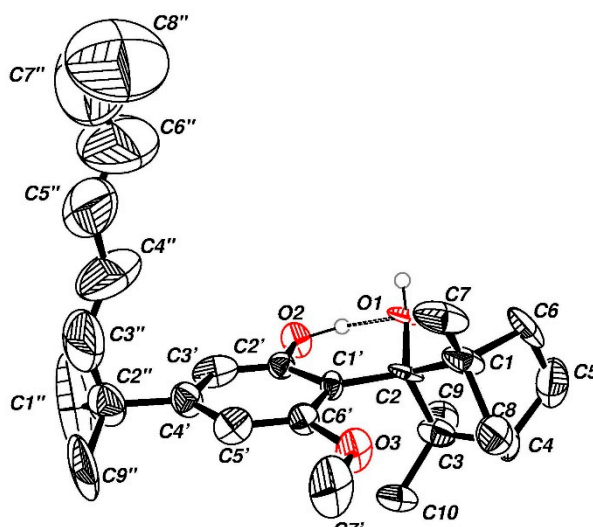

**5d**

Figure S3: Crystal structures of **1d** and **5d**

The bond length of C(3')-H(3') in **1b** was 0.97(2) Å while that of C(3')-F(1) in **4b** was 1.365(4) Å (Figure 2S). The bond lengths were within normal ranges (1.09 Å for C-H bond [1] and 1.35 Å for C-F bond [2]). The C-F bond length was slightly longer than C-H. The angles of C(2')-C(3')-H(3') and C(2')-C(3')-F(1) were 119.3(1)° and 116.7(4)°, respectively. In both compounds, **1b** and **4b**, the molecules were interlinked by intermolecular hydrogen bonds. Regarding **1d** and **5d** (Figure 3S), the replacement of a methoxyl group with a hydroxyl group on the C(2') position of the aromatic ring increased the O(1)-C(2)-C(1) angle by 4° [from 103.3(3) to 107.2(4)] and decreased the O(1)-C(2)-C(3) dihedral angle by 5.5° [from 112.7(3) to 107.2(5)]. In **1d**, the hydrogen bond was O(1)-H(1)···O(3). However, when this compound was demethylated (**5d**), the hydrogen bond changed to O(2)-H(2)···(O1) and O(1)-H(1) made a hydrogen bond to O(2) of neighboring molecule.

1. Handbook of Chemistry & Physics (65th ed.). CRC Press.
2. O'Hagan, D. Understanding organofluorine chemistry. An introduction to the C-F bond. *Chem. Soc. Rev.* **2008**, 37, 308–319.

Table S1: Crystal data and structure refinement for **1b**, **4b**, **1d** and **5d**

|                                                                      | <b>1b</b>                                      | <b>4b</b>                                        | <b>1d</b>                                      | <b>5d</b>                                      |
|----------------------------------------------------------------------|------------------------------------------------|--------------------------------------------------|------------------------------------------------|------------------------------------------------|
| Empirical formula                                                    | C <sub>23</sub> H <sub>36</sub> O <sub>3</sub> | C <sub>23</sub> H <sub>35</sub> F O <sub>3</sub> | C <sub>27</sub> H <sub>44</sub> O <sub>3</sub> | C <sub>26</sub> H <sub>42</sub> O <sub>3</sub> |
| Formula weight                                                       | 360.52                                         | 378.51                                           | 416.62                                         | 402.60                                         |
| Temperature [K]                                                      | 293(1)                                         | 295(1)                                           | 293(1)                                         | 293(1)                                         |
| Wavelength                                                           | 0.71073                                        | 0.71073                                          | 0.71073                                        | 0.71073                                        |
| Crystal system                                                       | Monoclinic                                     | Orthorhombic                                     | Orthorhombic                                   | Orthorhombic                                   |
| Space group                                                          | P2(1)/n                                        | P2(1)2(1)2(1)                                    | P2(1)2(1)2(1)                                  | P2(1)2(1)2(1)                                  |
| Unit cell dimensions                                                 |                                                |                                                  |                                                |                                                |
| a [Å]                                                                | 9.6585(5)                                      | 7.9475(5)                                        | 7.9490(4)                                      | 7.8307(5)                                      |
| b [Å]                                                                | 8.9094(4)                                      | 12.9307(8)                                       | 12.8962(6)                                     | 12.4716(7)                                     |
| c [Å]                                                                | 24.8603(1)                                     | 21.046(1)                                        | 24.934(1)                                      | 25.775(2)                                      |
| $\alpha$ [°]                                                         | 90.00                                          | 90.00                                            | 90.00                                          | 90.00                                          |
| $\beta$ [°]                                                          | 98.589(5)                                      | 90.00                                            | 90.00                                          | 90.00                                          |
| $\gamma$ [°]                                                         | 90.00                                          | 90.00                                            | 90.00                                          | 90.00                                          |
| Volume [Å <sup>3</sup> ]                                             | 2115.3(2)                                      | 2162.8(2)                                        | 2556.1(2)                                      | 2517.2(3)                                      |
| Z                                                                    | 4                                              | 4                                                | 4                                              | 4                                              |
| Density <sub>calcd</sub> [mg/m <sup>3</sup> ]                        | 1.132                                          | 1.162                                            | 1.083                                          | 1.062                                          |
| Absorption coefficient [mm <sup>-1</sup> ]                           | 0.073                                          | 0.081                                            | 0.068                                          | 0.067                                          |
| F(000)                                                               | 792                                            | 824                                              | 920                                            | 888                                            |
| Crystal size [mm <sup>3</sup> ]                                      | 0.44 x 0.40 x 0.16                             | 0.54 x 0.11 x 0.09                               | 0.65 x 0.50 x 0.32                             | 0.54 x 0.30 x 0.09                             |
| 2 $\theta$ range for data collection/°                               | 4.338 to 53.996                                | 3.87 to 53.996                                   | 4.544 to 54                                    | 3.628 to 49.984                                |
| Index ranges                                                         | -12<= $h$ <=12                                 | -10<= $h$ <=10                                   | -10<= $h$ <=10                                 | -9<= $h$ <=9                                   |
|                                                                      | -11<= $k$ <=11                                 | -16<= $k$ <=16                                   | -16<= $k$ <=16                                 | -14<= $k$ <=14                                 |
|                                                                      | -31<= $l$ <=31                                 | -26<= $l$ <=26                                   | -31<= $l$ <=31                                 | -30<= $l$ <=30                                 |
| Reflections collected                                                | 21747                                          | 22791                                            | 27024                                          | 22451                                          |
| Independent reflections                                              | 4626 [R <sub>(int)</sub> = 0.0444]             | 4721 [R <sub>(int)</sub> = 0.0790]               | 5576 [R <sub>(int)</sub> = 0.0737]             | 4435 [R <sub>(int)</sub> = 0.0840]             |
| Data / restraints / parameters                                       | 4626/0/253                                     | 4721/0/254                                       | 5576/0/283                                     | 4435/0/277                                     |
| Goodness-of-fit on F <sup>2</sup>                                    | 1.103                                          | 1.150                                            | 1.072                                          | 1.115                                          |
| Final R indices [I>2 $\sigma$ (I)]; R <sub>1</sub> , wR <sub>2</sub> | 0.0663, 0.1628                                 | 0.0679, 0.1204                                   | 0.0804, 0.2040                                 | 0.0906, 0.1781                                 |
| R <sub>1</sub> , wR <sub>2</sub> (all data)                          | 0.0817, 0.1722                                 | 0.1064, 0.1373                                   | 0.0971, 0.2160                                 | 0.1359, 0.1969                                 |
| Largest diff. peak and hole [e.Å <sup>-3</sup> ]                     | 0.25/-0.22                                     | 0.22/-0.21                                       | 0.29/-0.30                                     | 0.21/-0.17                                     |

Table S2: Hydrogen bonds for **1b**, **4b**, **1d**, and **5d** (Å, u)

| Cpd       | D-H...A           | d(D-H)  | d(H...A) | d(D...A) | <(DHA) |
|-----------|-------------------|---------|----------|----------|--------|
| <b>1b</b> | O(1)-H(1)...O(3)  | 0.85(3) | 1.78(3)  | 2.531(2) | 147(3) |
| <b>4b</b> | O(1)-H(1)...O(3)  | 0.89(5) | 1.81(5)  | 2.564(4) | 141(5) |
| <b>1d</b> | O(1)-H(1)...O(3)  | 0.87(6) | 1.75(6)  | 2.518(5) | 145(5) |
| <b>5d</b> | O(2)-H(2)...O(1)  | 0.95(7) | 1.66(7)  | 2.483(6) | 142(6) |
|           | O(1)-H(1)...O(2)# | 0.92(7) | 1.93(7)  | 2.795(6) | 156(6) |

Symmetry transformations used to generate equivalent atoms: #1 1/2+X, 1/2-Y, 1-Z



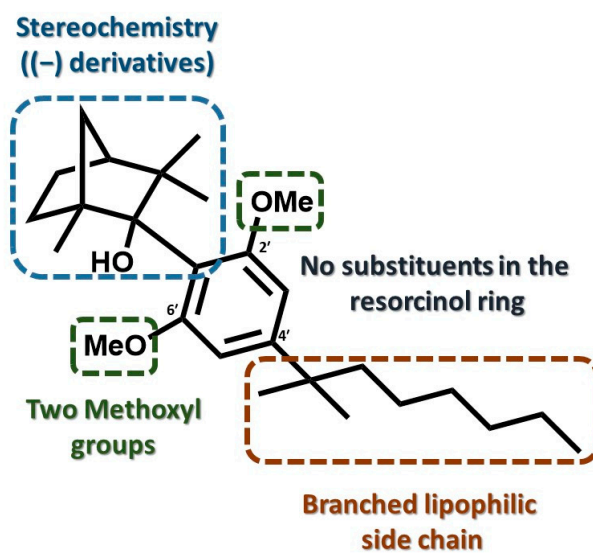

Figure S4: Structural Requirements for CB2 affinity and selectivity

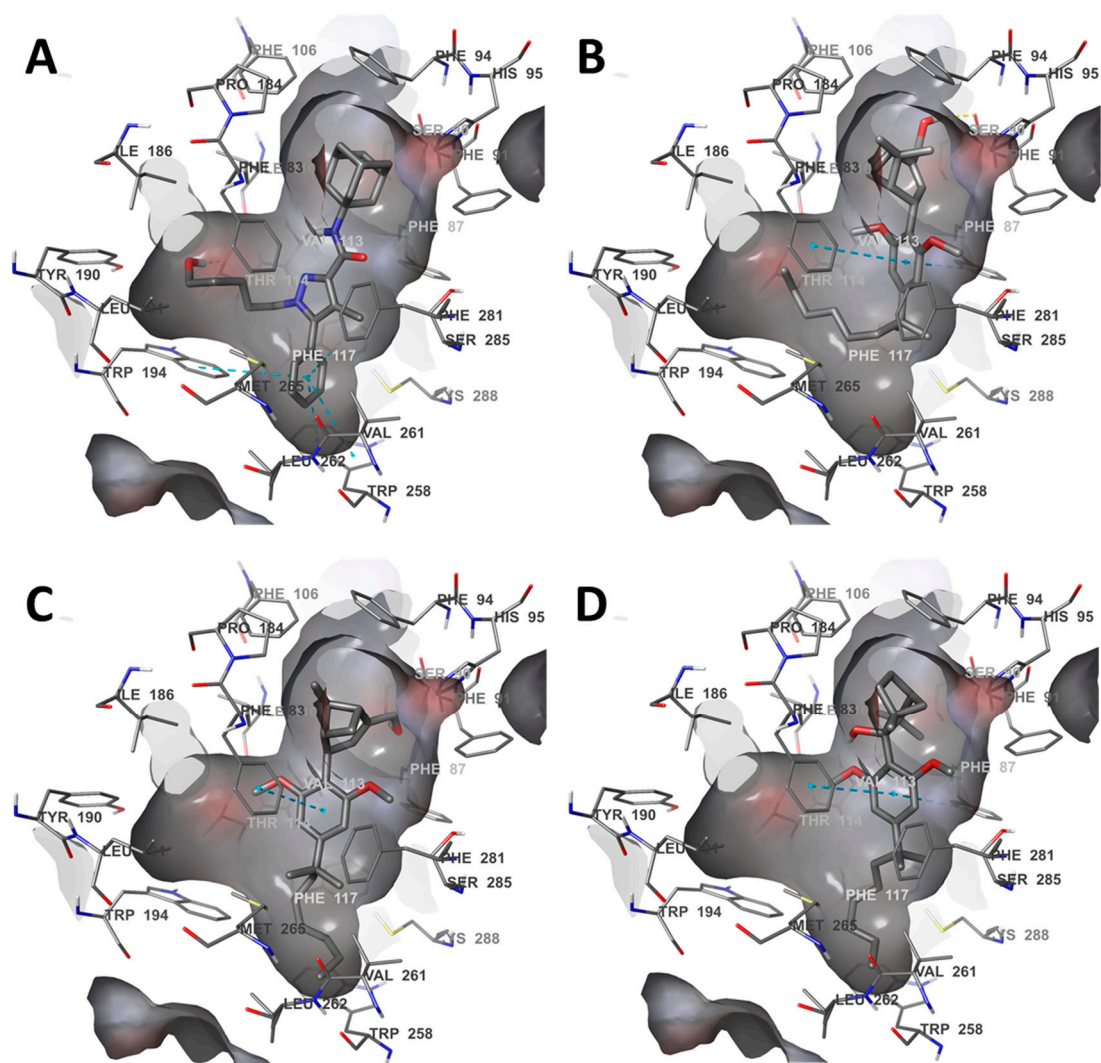

Figure S5: Binding site of the CB2 cavity is represented by electrostatic potential surface. The residues of binding site and ligands are represented by thin and thick tubes respectively. H-bonds and  $\pi$ - $\pi$  interactions are represented by orange and cyan dotted lines respectively. A. **5ZTY\_Ligand** B. **HU-308** C. **HU-433** D. **1d**.

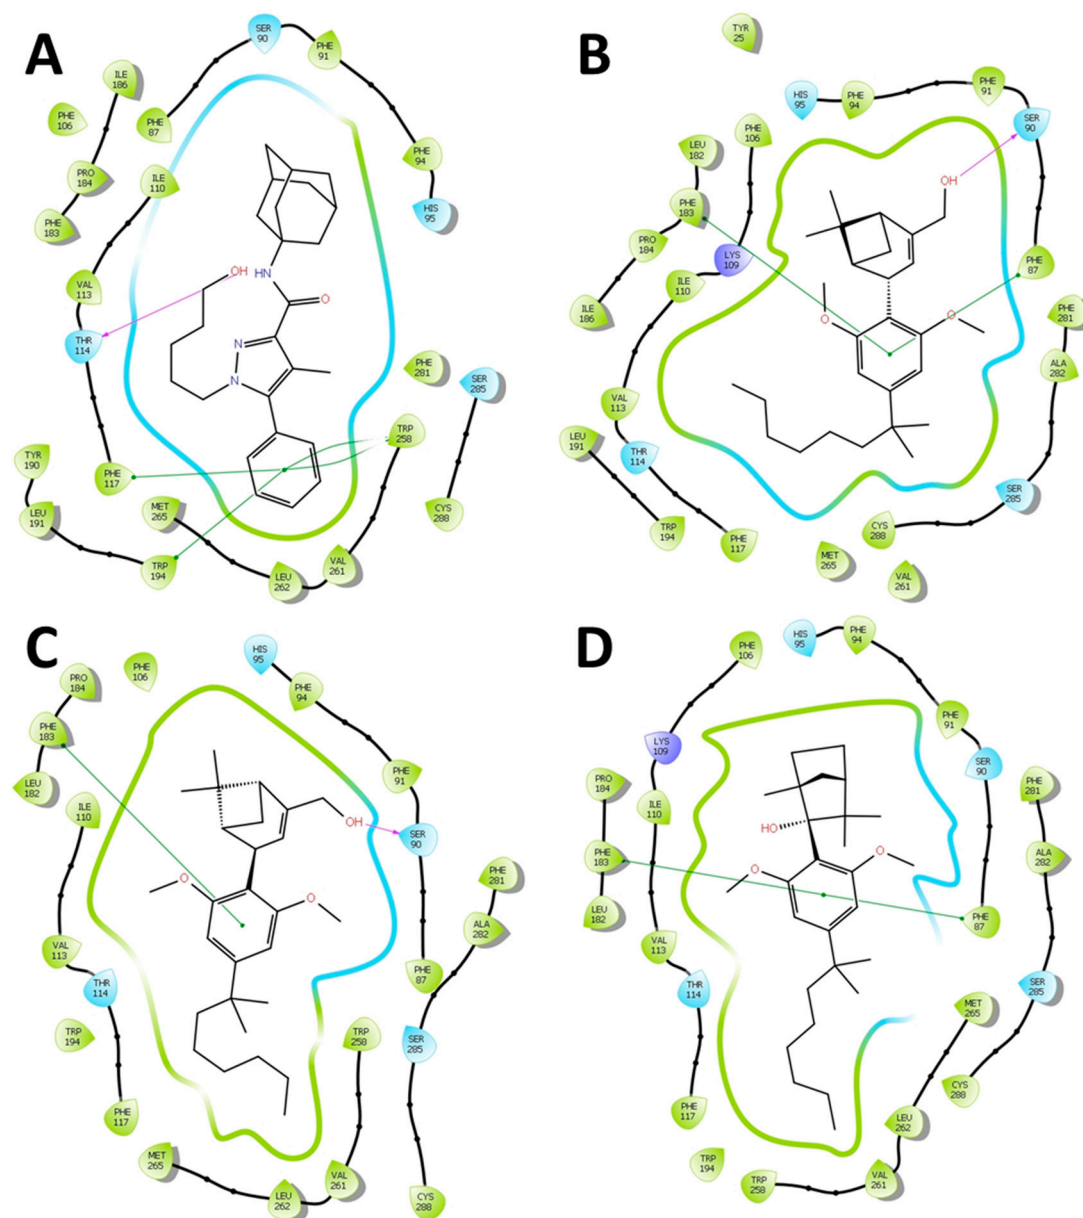

Figure S6: Two dimensional representation of protein-ligand interactions. A. 5ZTY\_Ligand B. HU-308 C. HU-433 D. 1d.

Table S3: Docking Glide XP score with energy decomposition

| Compound      | Ki (nM)<br>hCB2R | XP GScore<br>(Kcal/mol) | XP<br>HBond | XP<br>PhobEn | XP<br>LowMW | XP<br>RotPenal | XP<br>LipophilicEvdW | XP<br>Electro |
|---------------|------------------|-------------------------|-------------|--------------|-------------|----------------|----------------------|---------------|
| <b>1a</b>     | 47.7             | -10.578                 | -0.480      | -2.700       | -0.298      | 0.253          | -7.288               | -0.065        |
| <b>1b</b>     | 14.45            | -10.352                 | -0.480      | -2.700       | -0.298      | 0.253          | -7.091               | -0.035        |
| <b>1c</b>     | 56.81            | -11.301                 | -0.480      | -2.700       | -0.111      | 0.293          | -8.301               | -0.001        |
| <b>1d</b>     | 3.509            | -11.582                 | -0.480      | -2.700       | -0.111      | 0.293          | -8.534               | -0.049        |
| <b>1e</b>     | >10 $\mu$ M      | -9.573                  | -0.480      | -2.700       | -0.485      | 0.085          | -5.918               | -0.075        |
| <b>1f</b>     | 233.1            | -9.562                  | -0.480      | -2.700       | -0.485      | 0.085          | -5.890               | -0.092        |
| <b>2a</b>     | 223.5            | -10.747                 | -0.480      | -2.700       | -0.251      | 0.295          | -7.578               | -0.032        |
| <b>2b</b>     | 73.38            | -10.730                 | -0.480      | -2.700       | -0.251      | 0.295          | -7.502               | -0.092        |
| <b>3a</b>     | 1012             | -9.714                  | -0.480      | -2.700       | -0.492      | 0.173          | -6.169               | -0.046        |
| <b>3b</b>     | 610.2            | -9.962                  | -0.480      | -2.700       | -0.492      | 0.173          | -6.368               | -0.095        |
| <b>3c</b>     | 444.1            | -9.930                  | -0.480      | -2.700       | -0.398      | 0.295          | -6.551               | -0.096        |
| <b>3d</b>     | 834.2            | -10.088                 | -0.480      | -2.700       | -0.398      | 0.295          | -6.707               | -0.098        |
| <b>3e</b>     | 2874             | -9.812                  | 0.000       | -2.700       | -0.398      | 0.148          | -6.800               | -0.062        |
| <b>3f</b>     | 1449             | -10.162                 | -0.480      | -2.700       | -0.398      | 0.148          | -6.637               | -0.094        |
| <b>3g</b>     | 1651             | -10.265                 | -0.480      | -2.700       | -0.258      | 0.298          | -7.102               | -0.023        |
| <b>3h</b>     | 494.3            | -10.893                 | -0.480      | -2.700       | -0.258      | 0.298          | -7.710               | -0.043        |
| <b>4a</b>     | 155.4            | -10.684                 | -0.480      | -2.700       | -0.238      | 0.232          | -7.157               | -0.051        |
| <b>4b</b>     | 28.33            | -10.560                 | -0.480      | -2.700       | -0.238      | 0.232          | -7.000               | -0.074        |
| <b>4c</b>     | 438.4            | -11.606                 | -0.480      | -2.700       | -0.051      | 0.271          | -8.468               | -0.039        |
| <b>4d</b>     | 56.56            | -11.418                 | -0.480      | -2.700       | -0.051      | 0.271          | -8.150               | -0.075        |
| <b>5a</b>     | 4978             | -10.404                 | -0.480      | -2.700       | -0.298      | 0.316          | -7.140               | -0.103        |
| <b>5b</b>     | 36.53            | -11.027                 | -0.960      | -2.700       | -0.298      | 0.316          | -7.343               | -0.042        |
| <b>5c</b>     | 107.4            | -11.455                 | -0.960      | -2.700       | -0.158      | 0.311          | -7.917               | -0.032        |
| <b>5d</b>     | 24.57            | -11.199                 | -0.960      | -2.700       | -0.158      | 0.311          | -7.609               | -0.084        |
| <b>HU-308</b> | 1.161            | -11.754                 | -0.638      | -2.700       | -0.118      | 0.344          | -8.483               | -0.160        |
| <b>HU-433</b> |                  | -11.848                 | -0.700      | -2.700       | -0.118      | 0.344          | -8.507               | -0.168        |

LC-UV-MS (ESI)

2-(2',6'-dimethoxy-4'-pentylphenyl)-1,3,3-trimethylbicyclo[2.2.1]heptan-2-ol (1a & 1b) C<sub>23</sub>H<sub>36</sub>O<sub>3</sub>

m/z calculated for 360.27, found 343.09 (m-OH) for **1a** and 342.98 (m-OH) for **1b**.

2-(2',6'-dimethoxy-4'-(2''-methyloctan-2''-yl)phenyl)-1,3,3-trimethylbicyclo-[2.2.-1]heptan-2-ol (1c & 1d) C<sub>27</sub>H<sub>44</sub>O<sub>3</sub>

m/z calculated 416.33, found 399.12 (m-OH) for **1c** and 399.02 (m-OH) for **1d**.

2-(2',6'-dimethoxy-4'-methylphenyl)-1,3,3-trimethylbicyclo[2.2.1]heptan-2-ol (1e & 1f) C<sub>19</sub>H<sub>28</sub>O<sub>3</sub>

m/z calculated 304.20, found 287.05 (m-OH) for **1e** and **1f**.

2-(3'-hexyl-2',6'-dimethoxyphenyl)-1,3,3-trimethylbicyclo[2.2.1]heptan-2-ol (2a & 2b) C<sub>24</sub>H<sub>38</sub>O<sub>3</sub>

m/z calculated 374.28, found 357.08 (m-OH) for **2a** and **2b**.

2-(2'-methoxy-5'-propylphenyl)-1,3,3-trimethylbicyclo[2.2.1]heptan-2-ol (3a & 3b) C<sub>20</sub>H<sub>30</sub>O<sub>2</sub>

m/z calculated 302.22, found 285.07 (m-OH) for **3a** and **3b**.

2-(2'-methoxy-5'-pentylphenyl)-1,3,3-trimethylbicyclo[2.2.1]heptan-2-ol (3c & 3d) C<sub>22</sub>H<sub>34</sub>O<sub>2</sub>

m/z calculated 330.26, found 313.09 (m-OH) for **3c** and **3d**.

2-(2'-methoxy-5'-(tert-pentyl)phenyl)-1,3,3-trimethylbicyclo[2.2.1]heptan-2-ol (3e & 3f) C<sub>22</sub>H<sub>34</sub>O<sub>2</sub>

m/z calculated 330.26, found 313.09 (m-OH) for **3e** and 313.10 (m-OH) for **3f**.

2-(2'-methoxy-5'-octylphenyl)-1,3,3-trimethylbicyclo[2.2.1]heptan-2-ol (3g & 3h) C<sub>25</sub>H<sub>40</sub>O<sub>2</sub>

m/z calculated 372.30, found 355.12 (m-OH) for **3g** and **3h**.

2-(3'-fluoro-2',6'-dimethoxy-4'-pentylphenyl)-1,3,3-trimethylbicyclo[2.2.1]heptan-2-ol (4a & 4b) C<sub>23</sub>H<sub>35</sub>FO<sub>3</sub>

m/z calculated 378.26, found 361.09 (m-OH) for **4a** and 360.91 (m-OH) for **4b**.

2-(3'-fluoro-2',6'-dimethoxy-4'-(2''-methyloctan-2''-yl)phenyl)-1,3,3-trimethylbicyclo[2.2.1]heptan-2-ol (4c & 4d) C<sub>27</sub>H<sub>43</sub>FO<sub>3</sub>

m/z calculated 434.32, found 417.13 (m-OH) for **4c** and 417.12 (m-OH) for **4d**.

2-(2'-hydroxy-6'-methoxy-4'-pentylphenyl)-1,3,3-trimethylbicyclo[2.2.1]heptan-2-ol (5a & 5b) C<sub>22</sub>H<sub>34</sub>O<sub>3</sub>

m/z calculated 346.25, found 328.99 (m-OH) for **5a** and 328.94 (m-OH) for **5b**.

2-(2'-hydroxy-6'-methoxy-4'-(2''-methyloctan-2''-yl)phenyl)-1,3,3-trimethylbicyclo[2.2.1]heptan-2-ol (5c & 5d) C<sub>26</sub>H<sub>42</sub>O<sub>3</sub>

m/z calculated 402.31, found 385.13 (m-OH) for **5c** and 384.97 (m-OH) for **5d**.

## Compound 1a, UV-247 nm

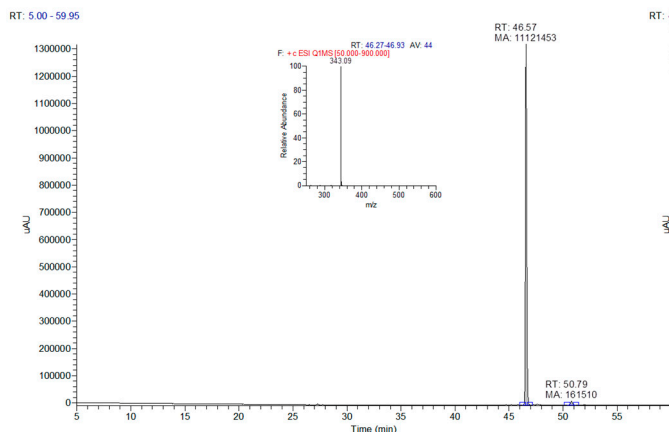

## Compound 1b, UV -245nm

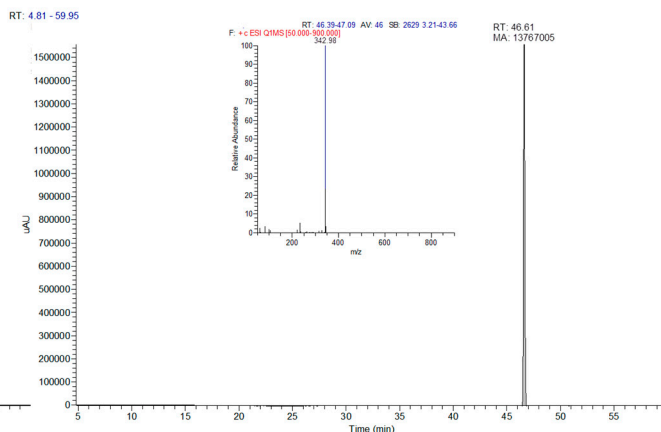

## Compound 1c, UV-245 nm

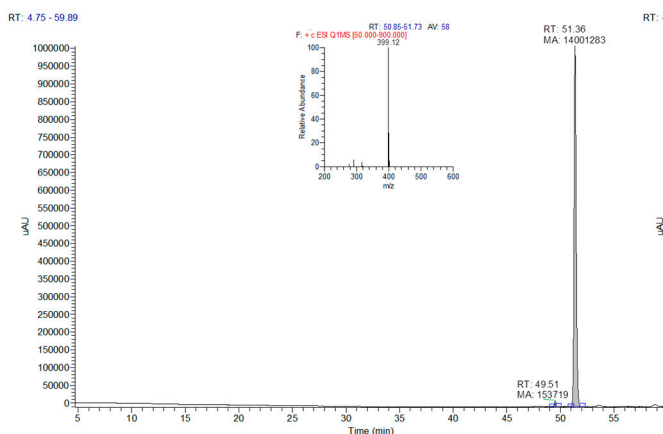

## Compound 1d, UV-242 nm

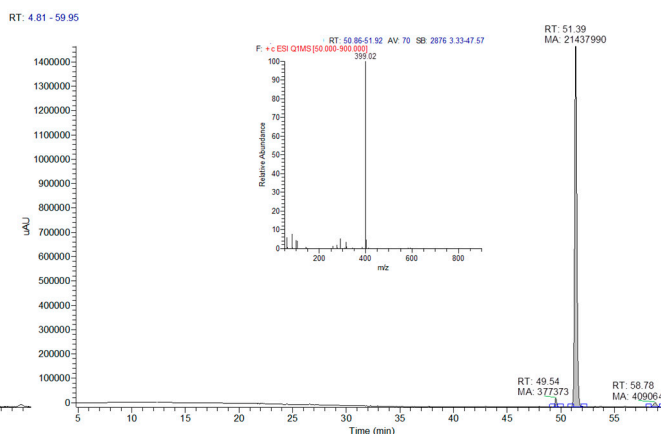

## Compound 1e, UV-245 nm

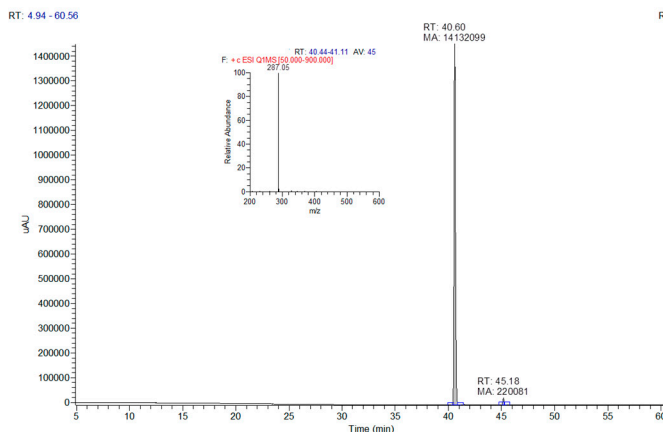

## Compound 1f, UV-245 nm

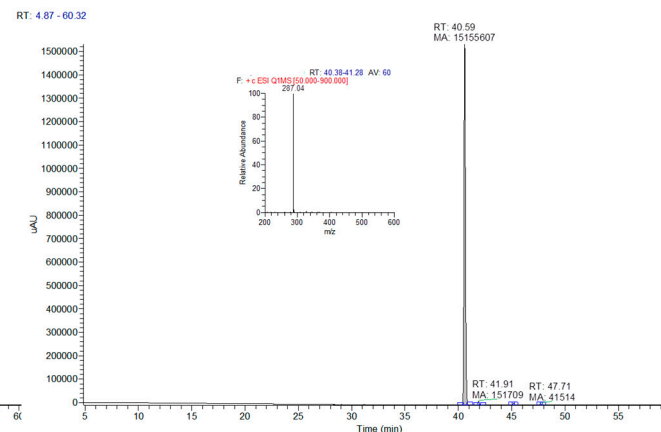

## Compound 2a, UV-240 nm

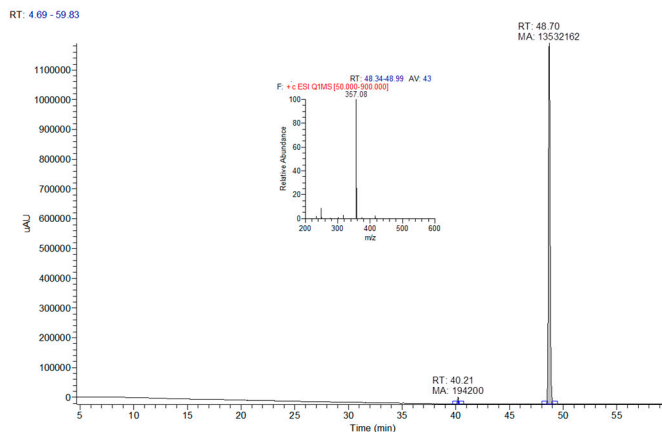

## Compound 2b, UV-254 nm

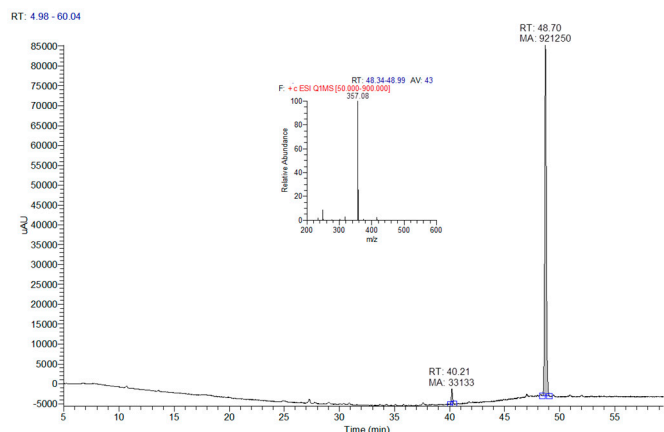

## Compound 3a, UV-230 nm

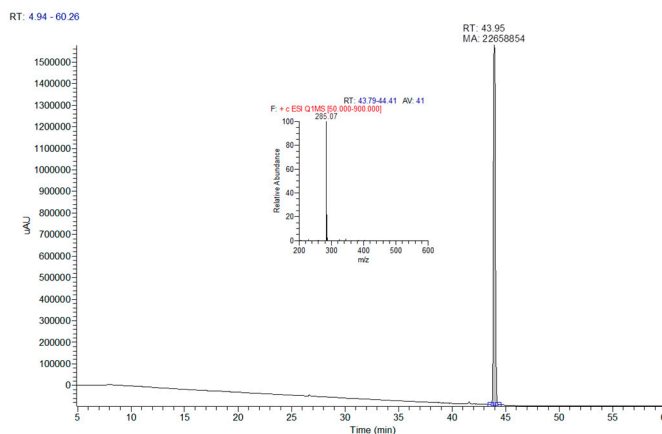

## Compound 3b, UV-235 nm

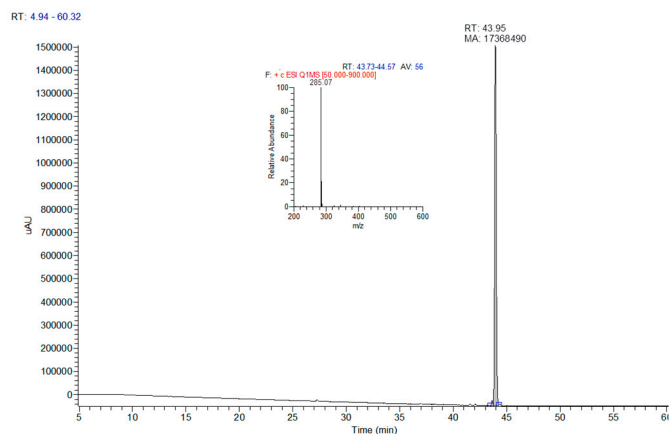

## Compound 3c, UV-235 nm

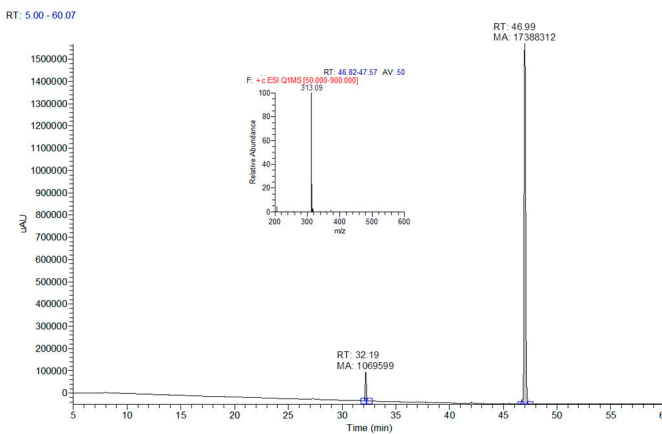

## Compound 3d, UV-237 nm

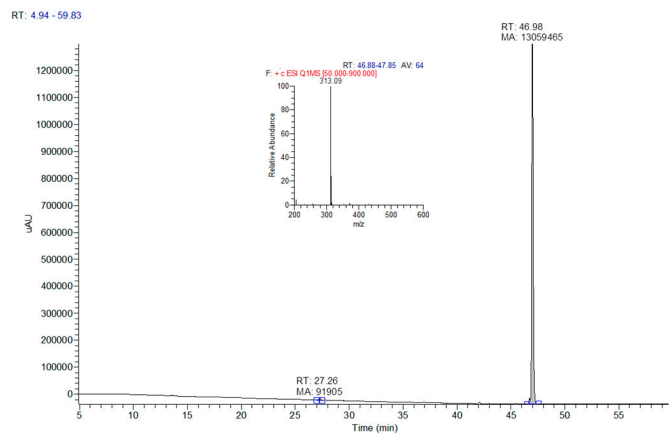

## Compound 3e, UV-235 nm

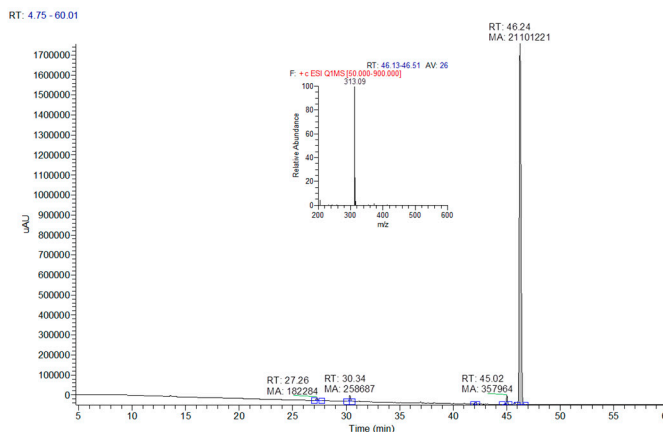

## Compound 3f, UV-235 nm

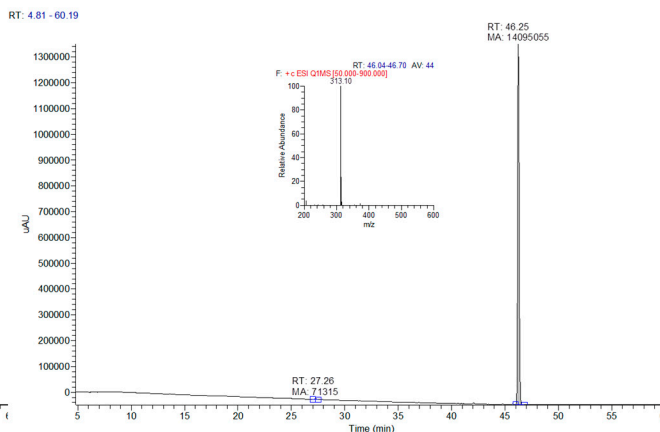

## Compound 3g, UV-235 nm

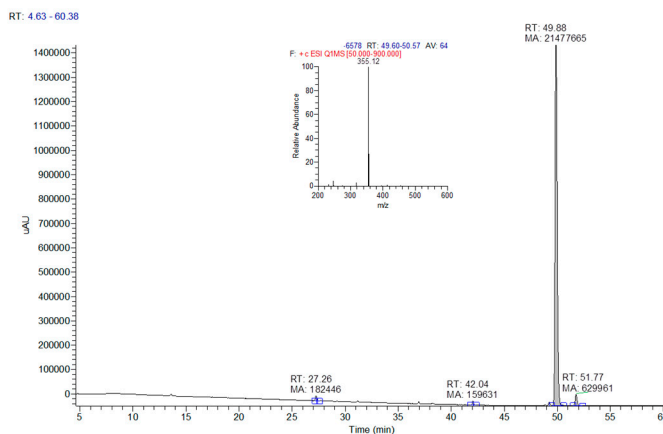

## Compound 3h, UV-230 nm

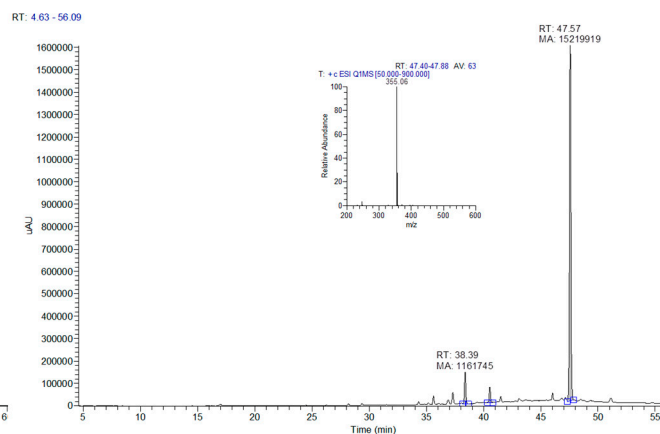

## Compound 4a, UV-232 nm

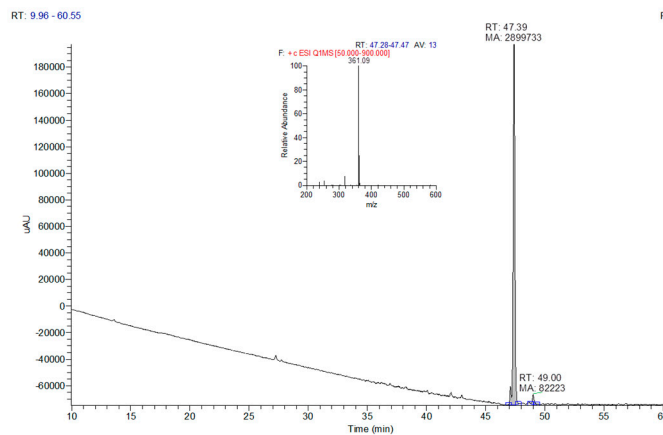

## Compound 4b, UV=285 nm

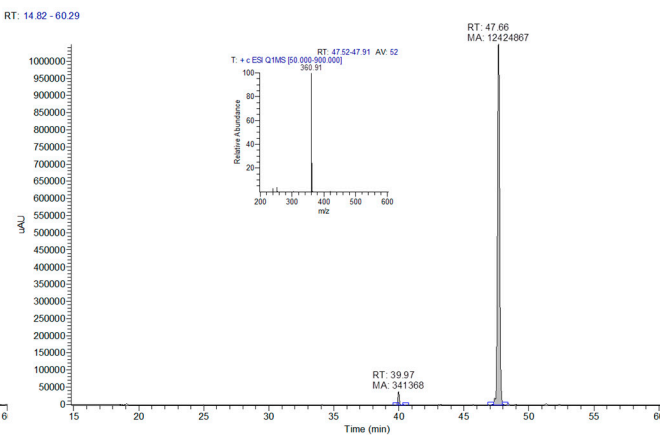



## Compound 4c, UV-230 nm

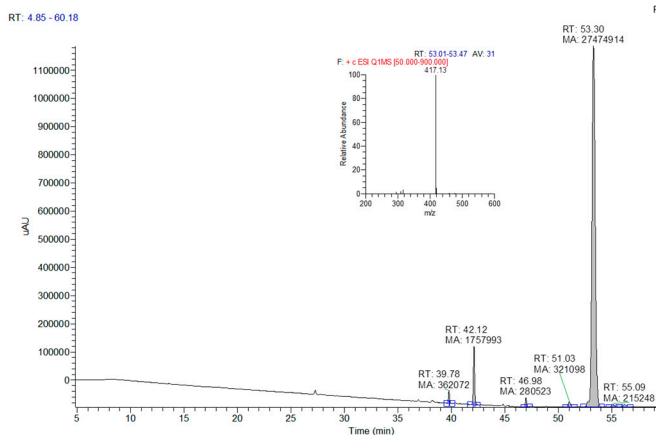

## Compound 4d, UV-230 nm

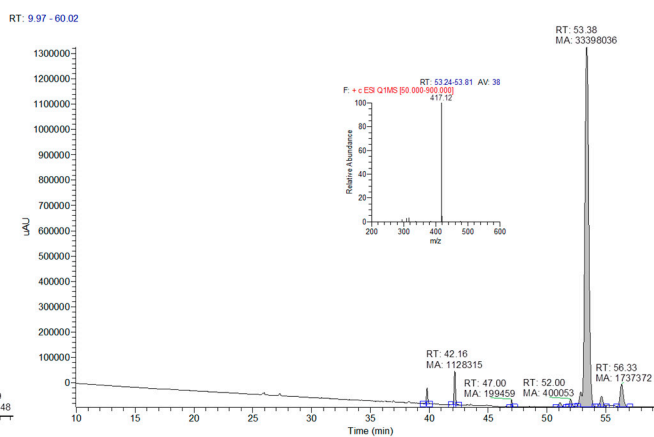

## Compound 5a, UV-247 nm

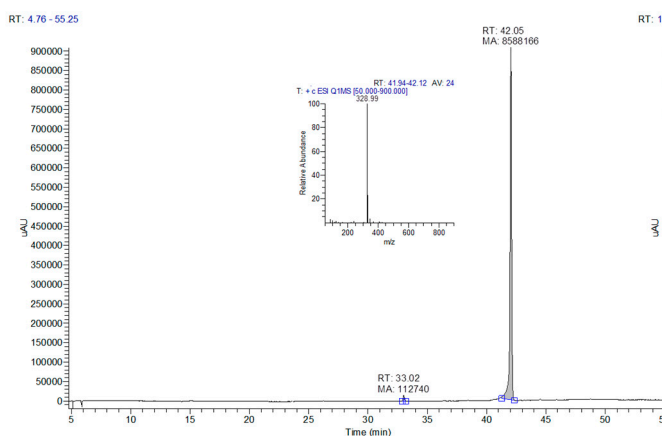

## Compound 5b, UV=270 nm

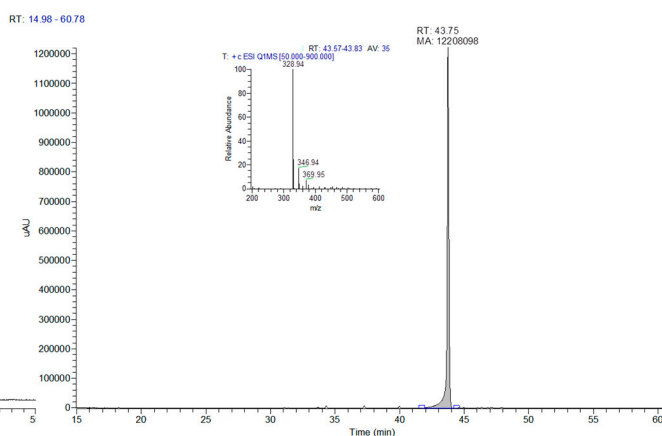

## Compound 5c, UV=235 nm

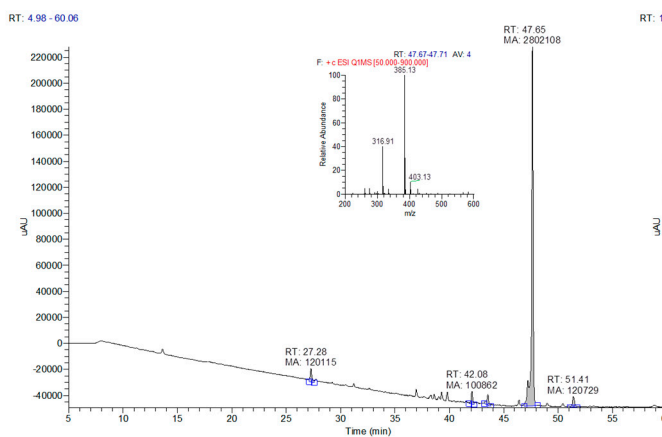

## Compound 5d, UV=270 nm

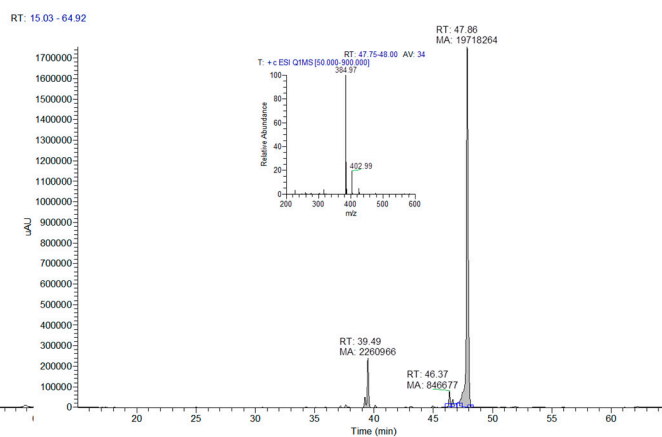

## NMR data for 1b

### **1H-NMR-1b**

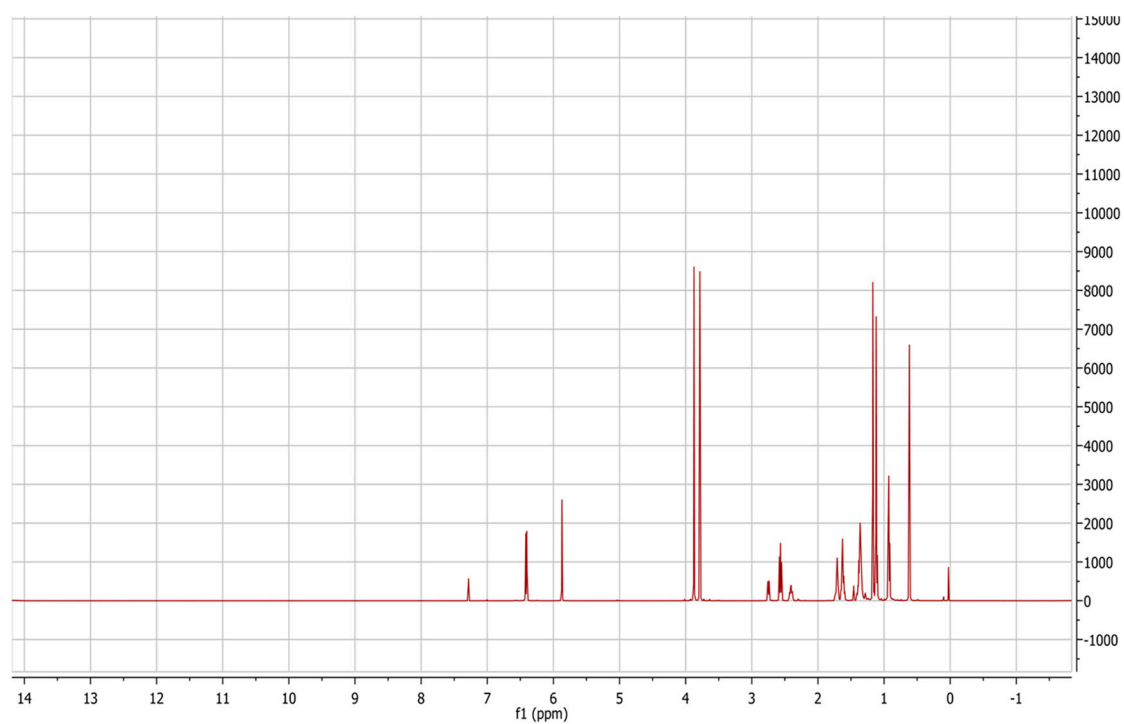

### **13C-NMR-1b**

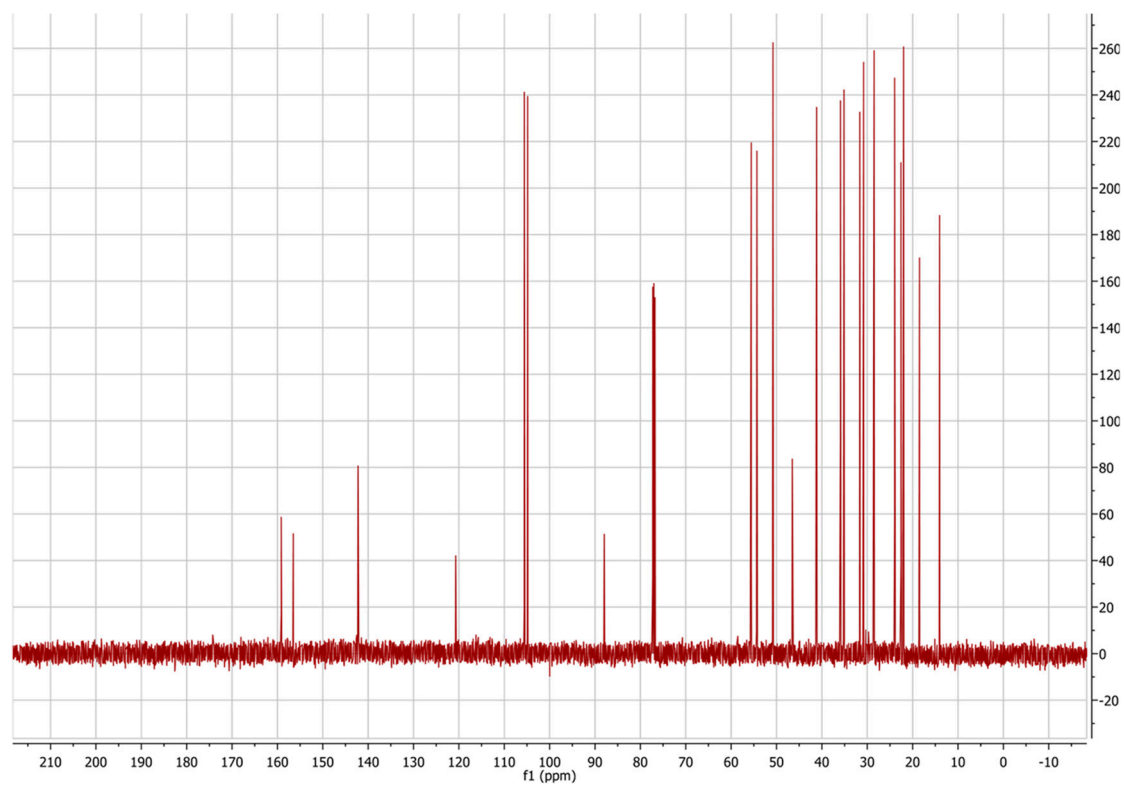

### **13C-DEPT-1b**

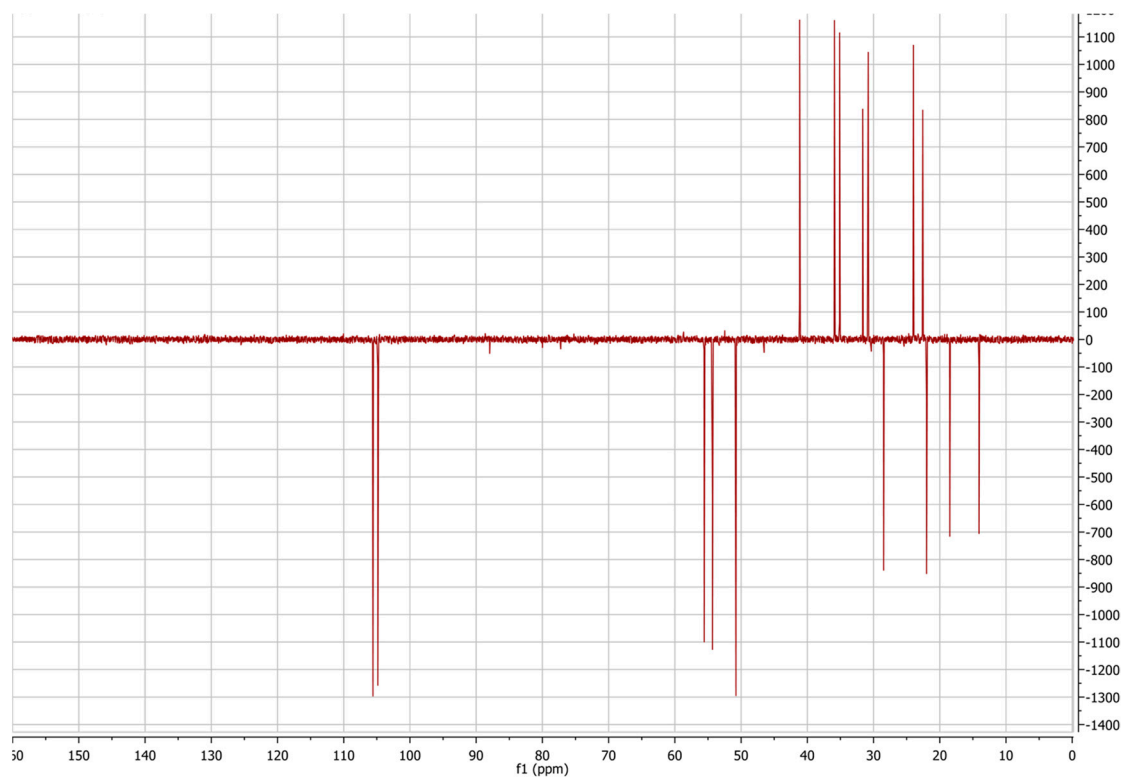

### **2D-HSQC-1b**

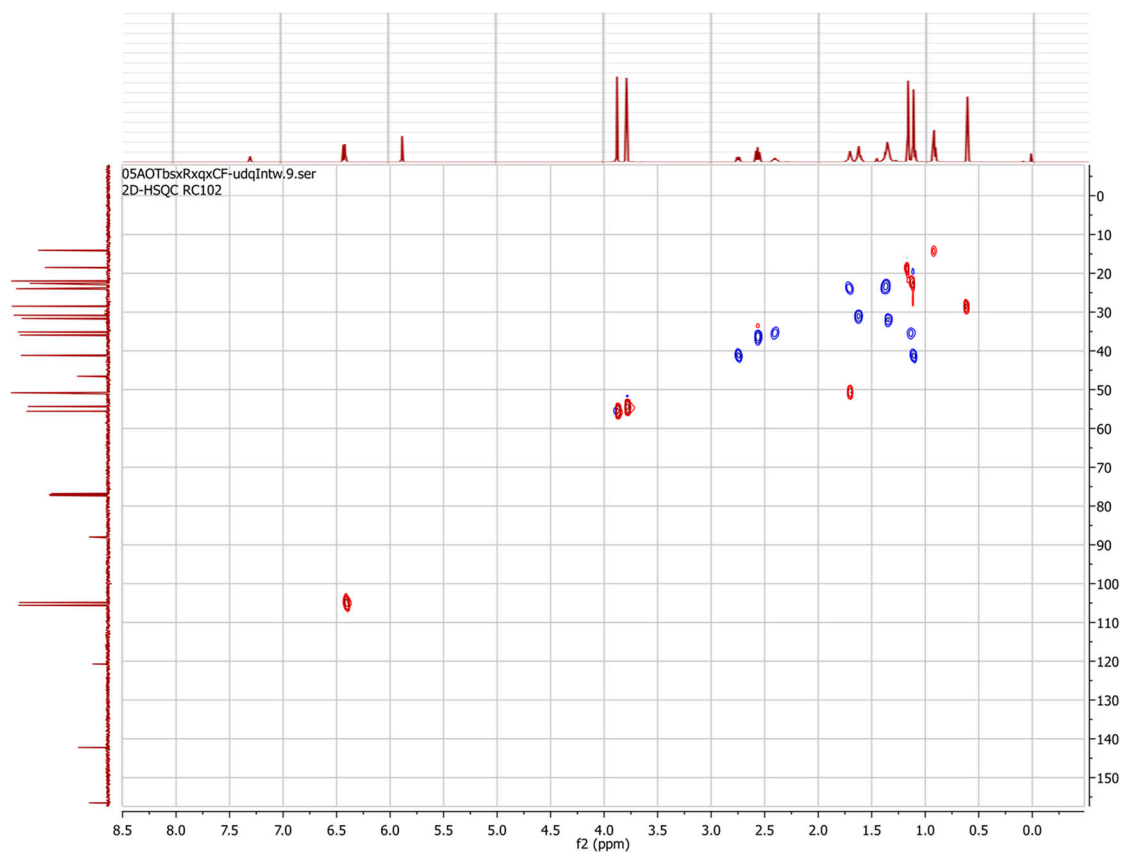

## 2D-HMBC-1b

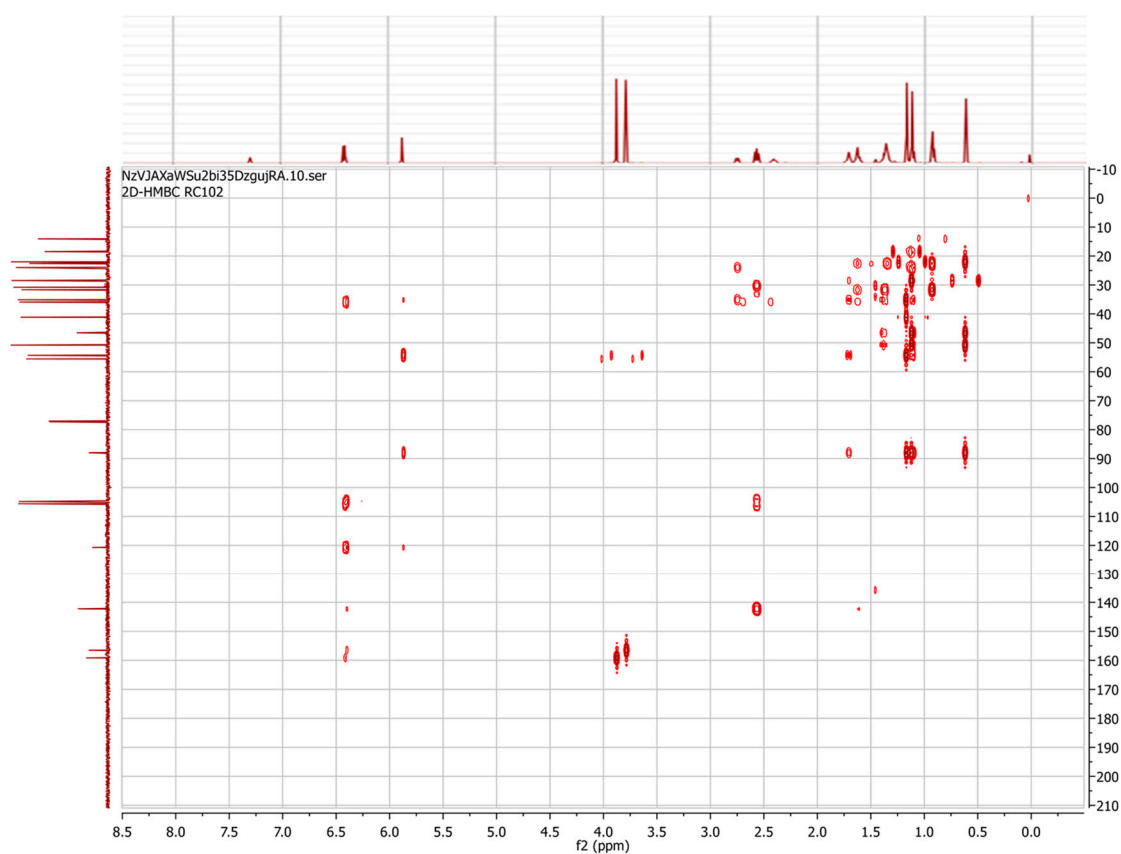

## 2D-COSY-1b

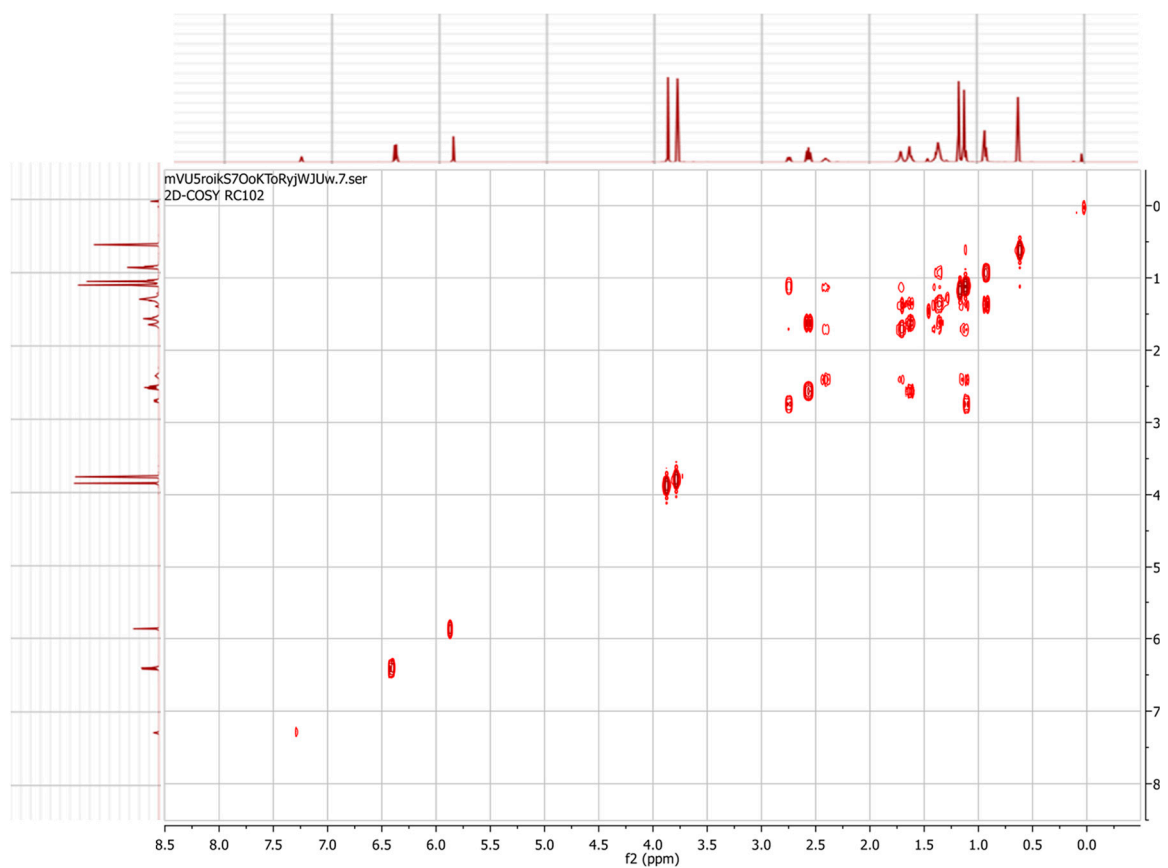

## 2D-TOCSY-1b

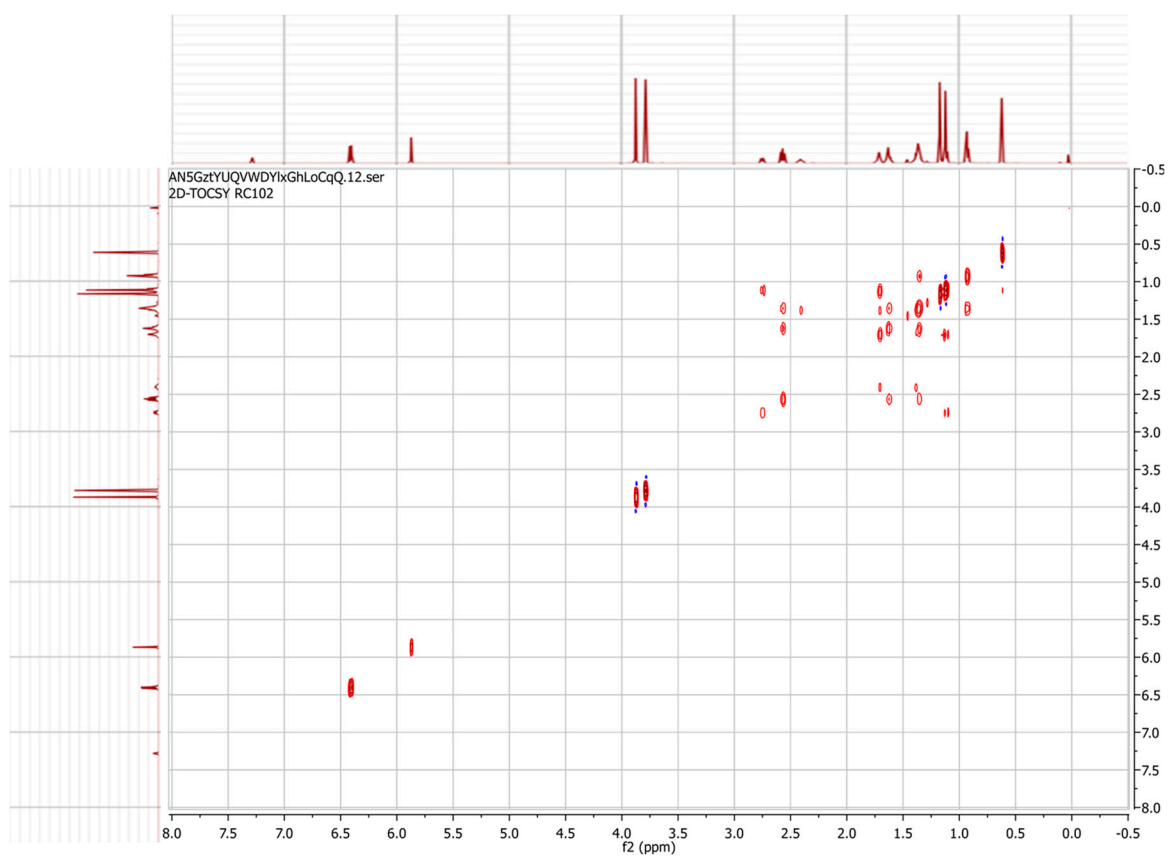

## NMR data for 1d

### **1H-NMR-1d**

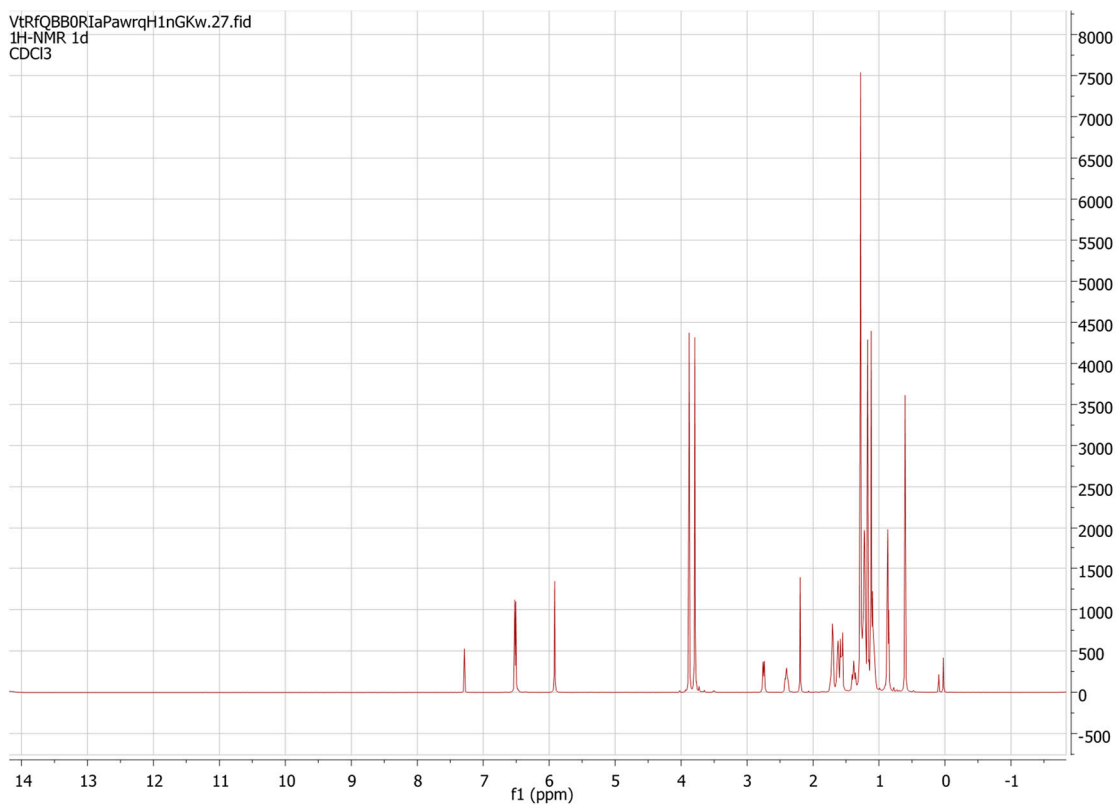

### **13C-NMR-1d**

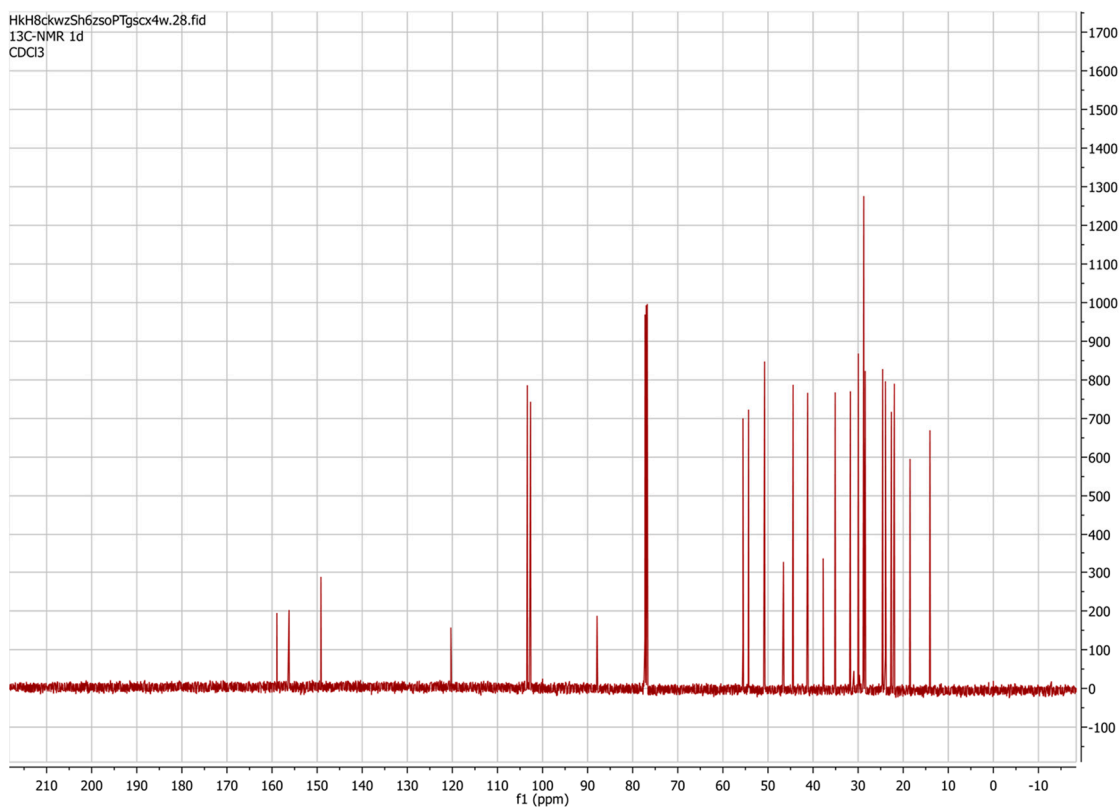

## **13C-DEPT-1d**

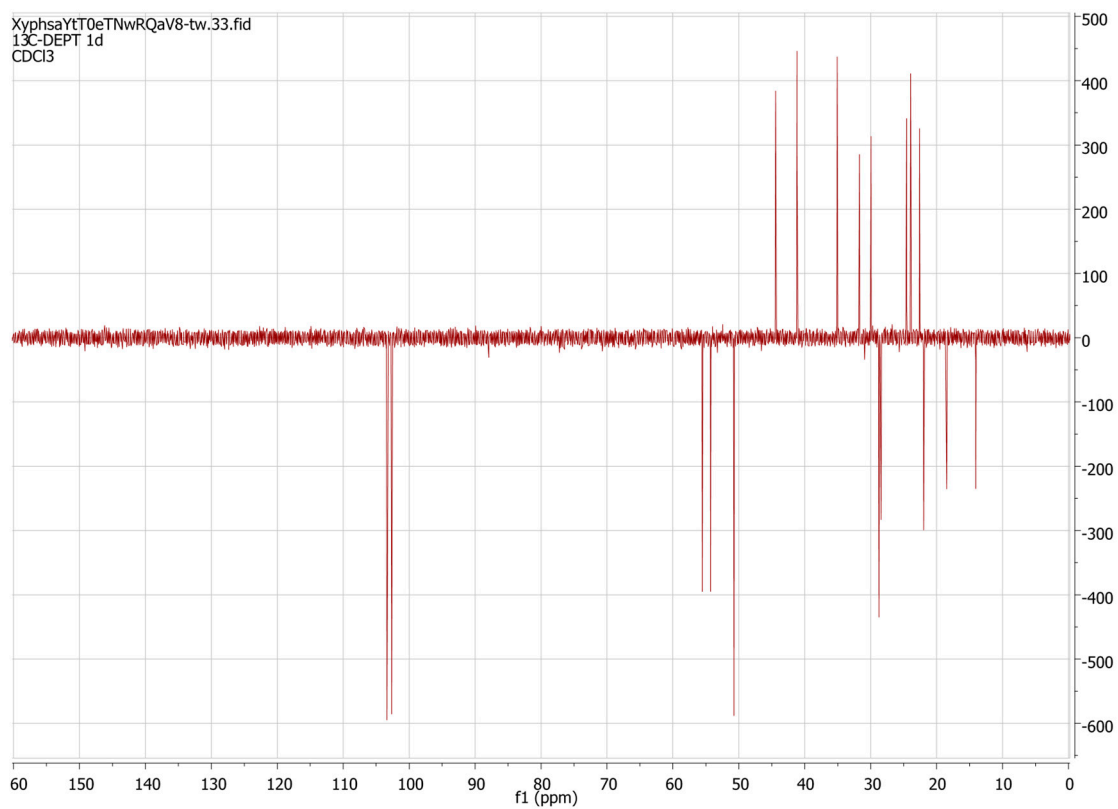

## **2D-HSQC-1d**

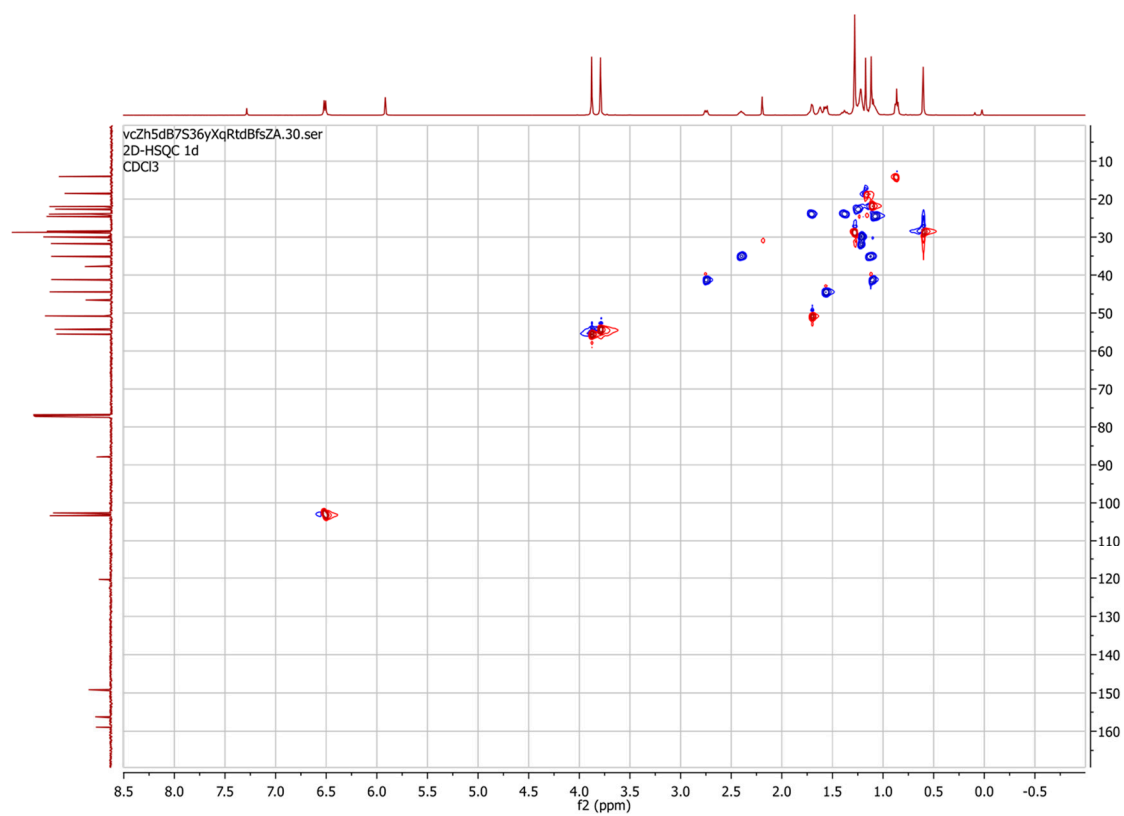

## 2D-HMBC-1d

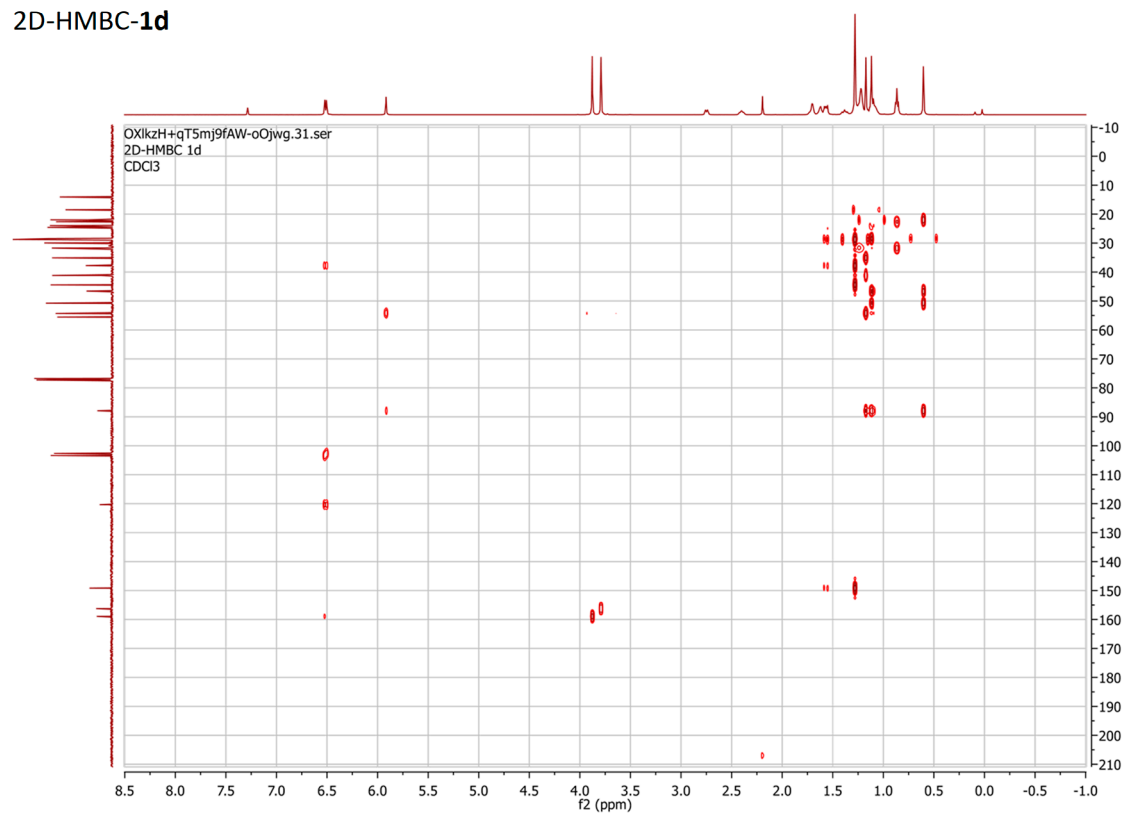

## 2D-COSY-1d

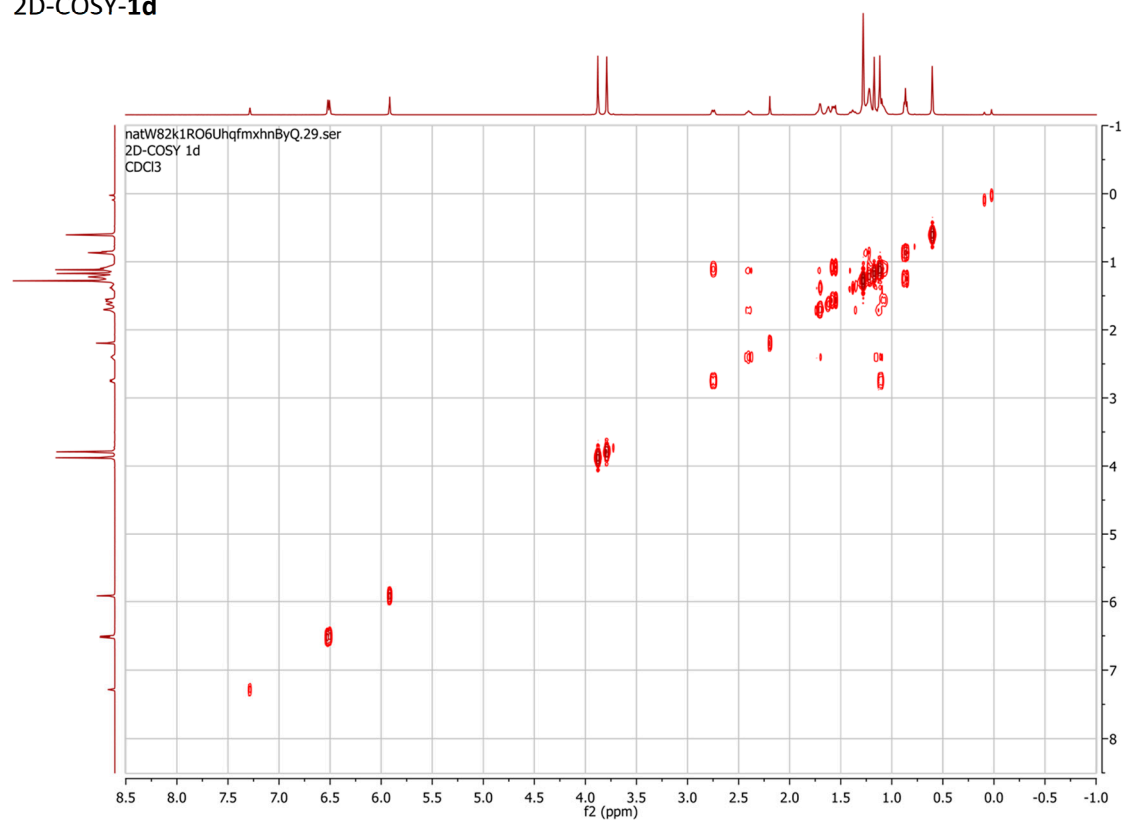



## 2D-TOCSY-1d

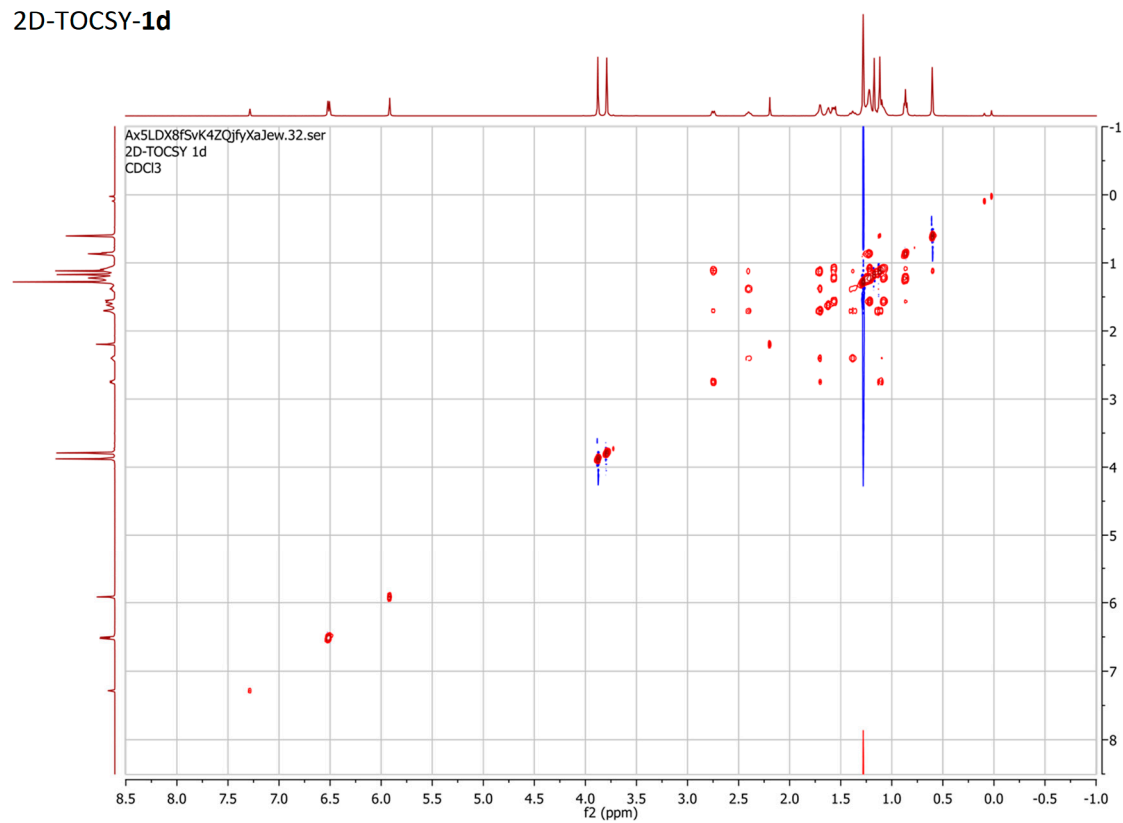

## NMR data for 5a

### **1H-NMR-5a**

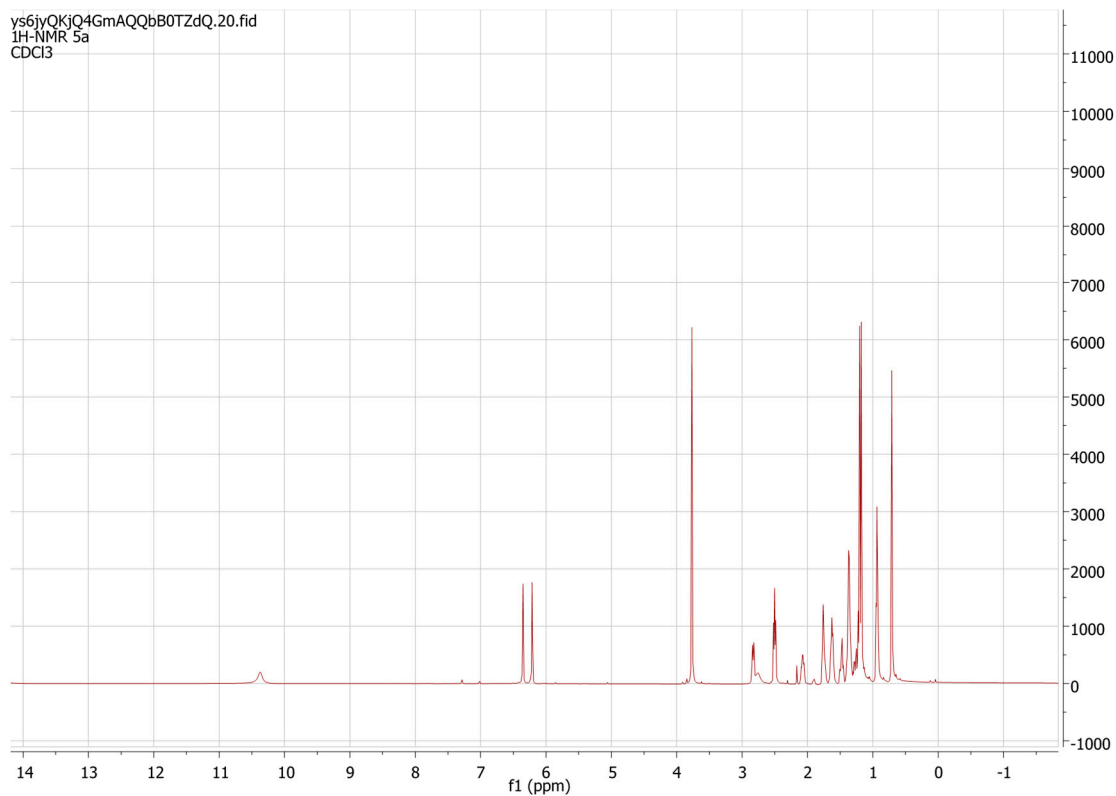

### **13C-NMR-5a**

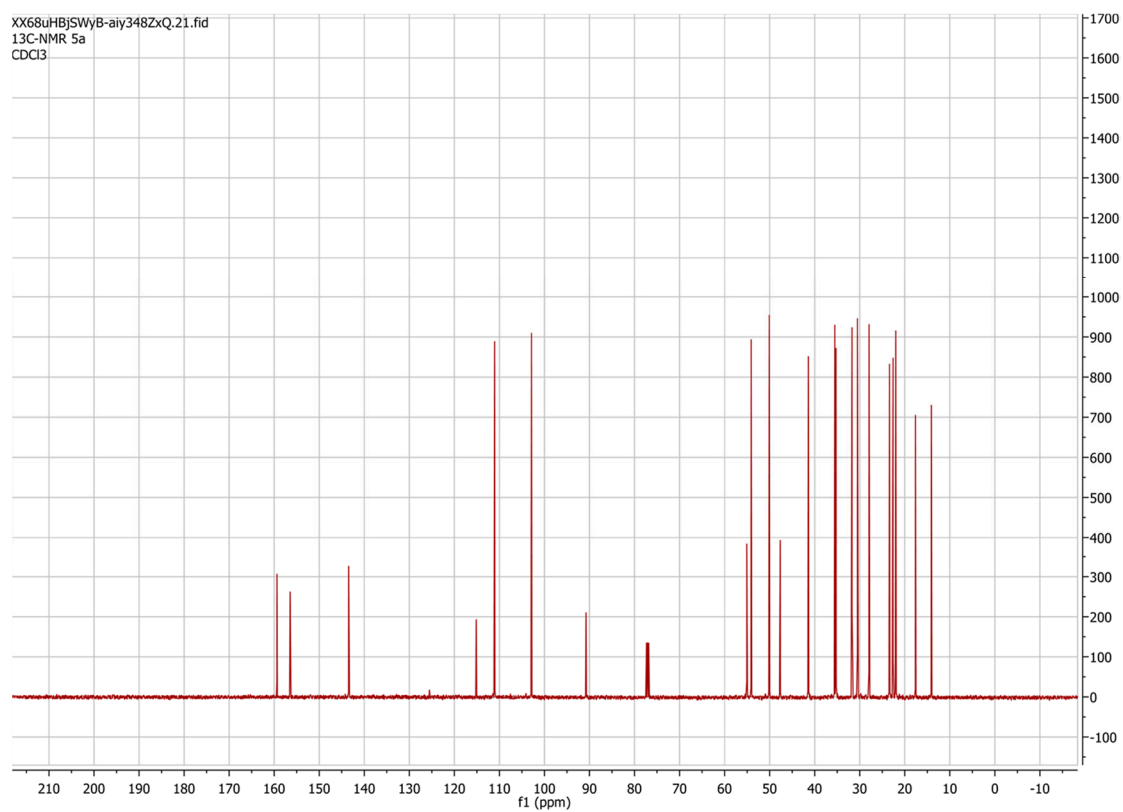

## **<sup>13</sup>C-DEPT-5a**

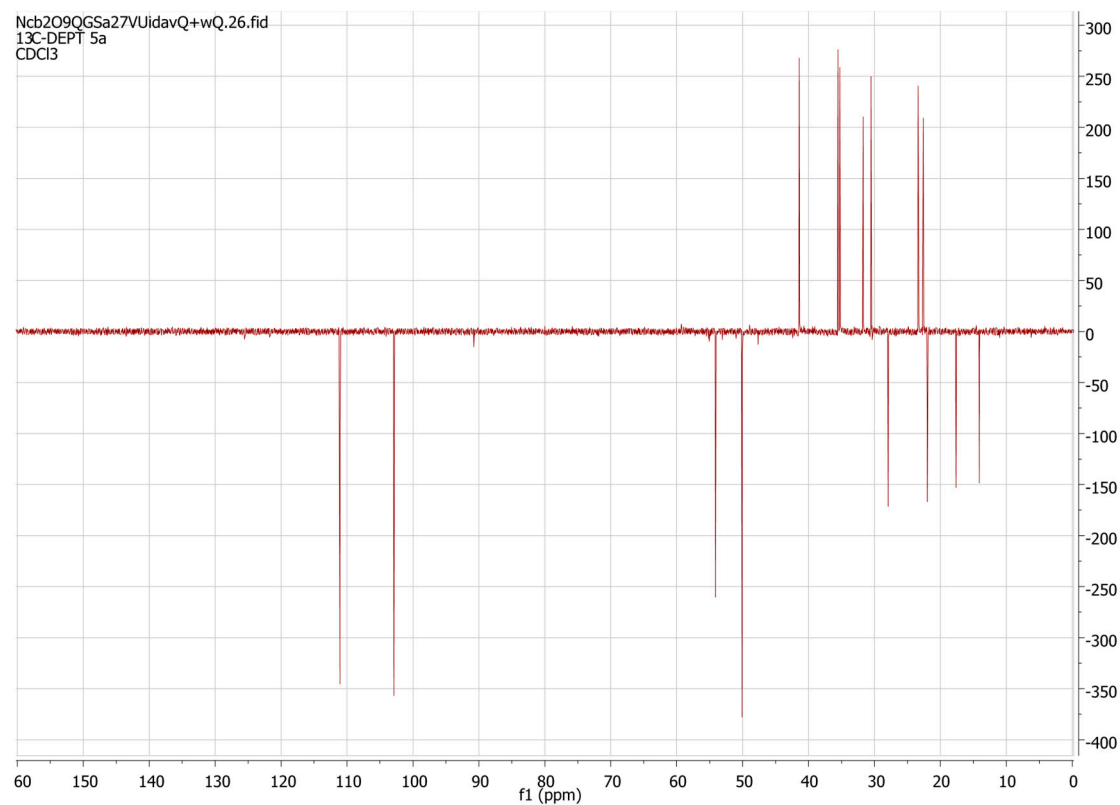

## **2D-HSQC-5a**

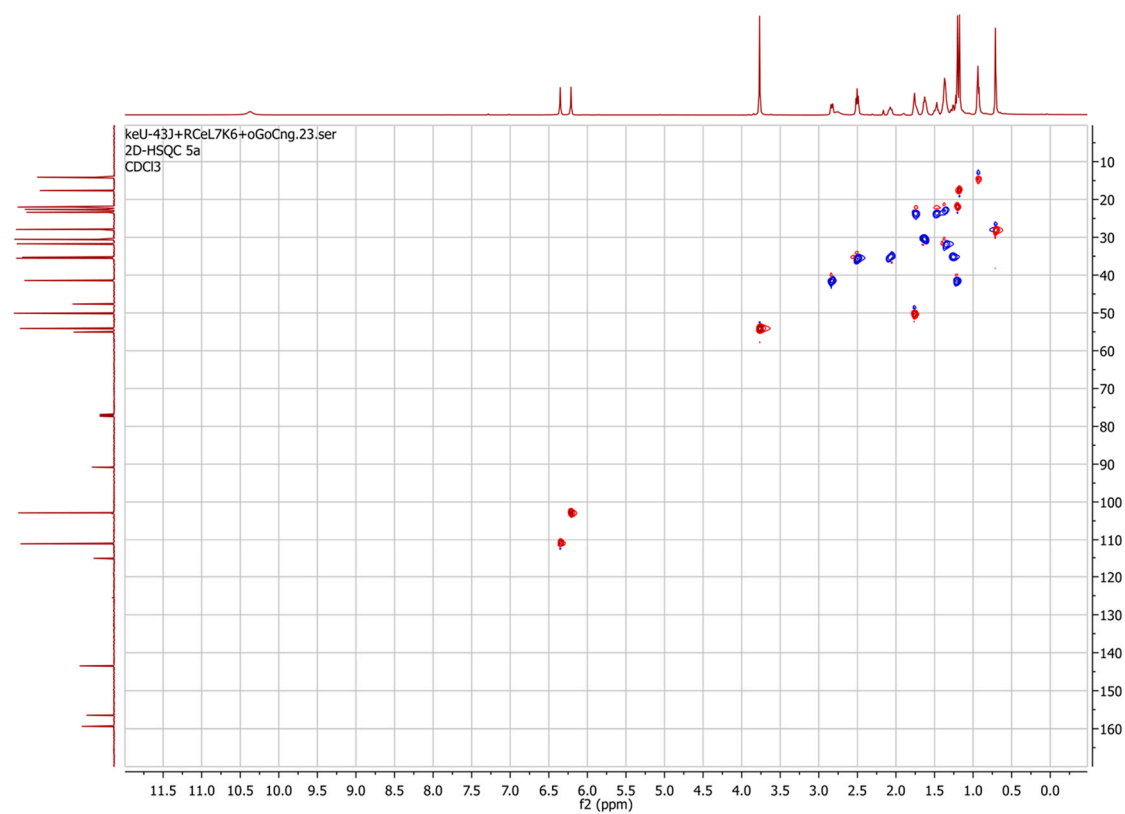

## 2D-HMBC-5a

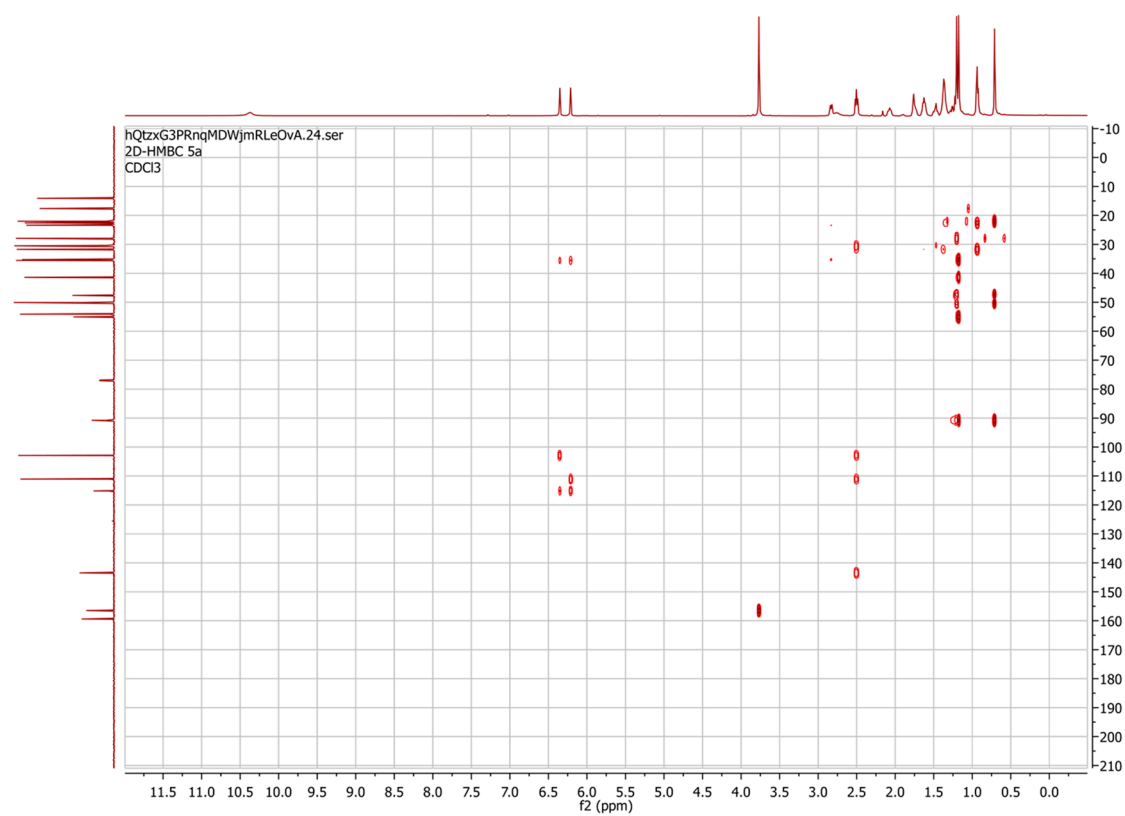

## 2D-COSY-5a

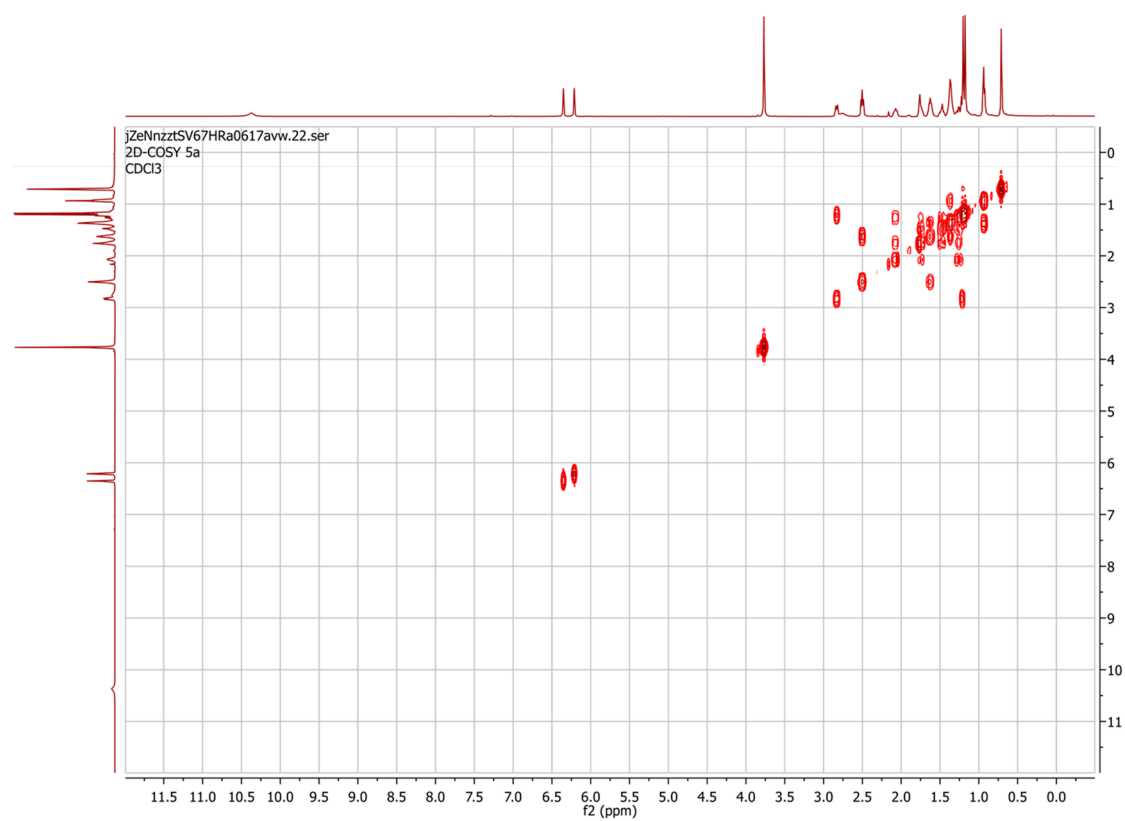

## 2D-TOCSY-5a

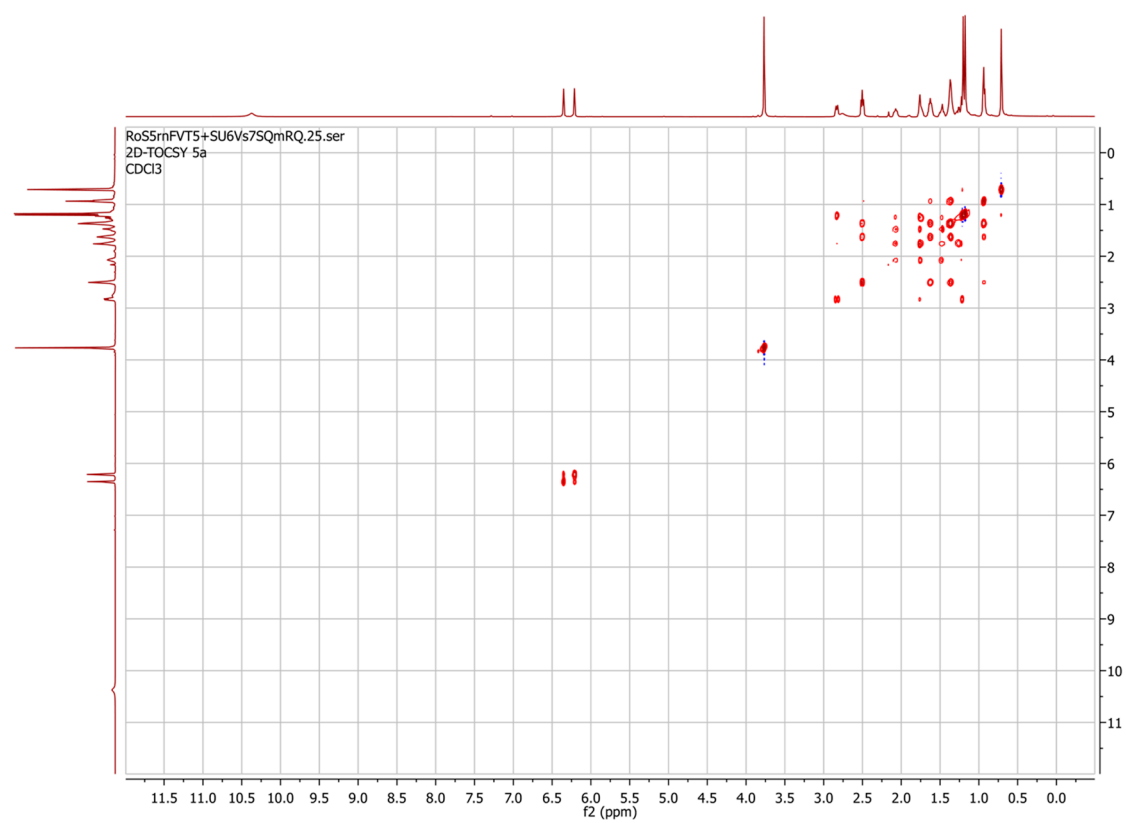

Supplement: s1 [file s1]
